# Supplementary material for: Discovery of Novel Ligands for Mouse Olfactory Receptor MOR42-3 Using an In Silico Screening Approach and In Vitro Validation
Source: PubMed Central journal article supplement (PMC3956865; doi:10.1371/journal.pone.0092064), 2014-03-17
Supplement: pone.0092064.s004.pdf [file pone.0092064.s004.pdf]

| Rank | mol                                                                                 | Name                         | formula    | molWeight | Score  | molLogP | molPSA | molVolume | Natom | Nflex | Hbond  | Hphob | Vwint  | Eintl | Dsolv | SolEI  | mfScore |
|------|-------------------------------------------------------------------------------------|------------------------------|------------|-----------|--------|---------|--------|-----------|-------|-------|--------|-------|--------|-------|-------|--------|---------|
| 1    | 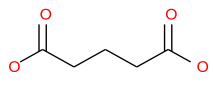   | glutaric acid                | C5H8O4     | 132.042   | -42.01 | -0.05   | 57.28  | 121.52    | 15    | 4     | -13.27 | -1.49 | -4.45  | 0.81  | 8.75  | -18.1  | -11.49  |
| 2    |    | succinic acid                | C4H6O4     | 118.027   | -40.81 | -0.53   | 57.28  | 103.62    | 12    | 3     | -13.21 | -1.21 | -8.03  | 0     | 8.75  | -10.45 | -25.76  |
| 3    |    | adipic acid                  | C6H10O4    | 146.058   | -40.15 | 0.43    | 57.28  | 139.43    | 18    | 5     | -12.18 | -1.87 | -8.76  | 5.58  | 8.68  | -13.4  | -20.05  |
| 4    |    | malonic acid                 | C3H4O4     | 104.011   | -36.55 | -0.96   | 57.28  | 85.29     | 9     | 2     | -9.82  | -0.74 | -12.03 | 0.65  | 8.67  | -10.43 | -18.27  |
| 5    |    | heptanedioic acid            | C7H12O4    | 160.074   | -35.61 | 0.92    | 57.28  | 157.34    | 21    | 6     | -12.42 | -2.19 | -2.57  | 7.58  | 8.73  | -15.59 | -4.98   |
| 6    |    | 9-methoxy-9-oxononanoic acid | C10H18O4   | 202.121   | -32.99 | 2.23    | 49.47  | 216.15    | 31    | 8     | -10.57 | -4.8  | -14.41 | 0.51  | 12.26 | -3.95  | -76.98  |
| 7    |   | 8-methoxy-8-oxooctanoic acid | C9H16O4    | 188.105   | -30.2  | 1.75    | 49.47  | 198.25    | 28    | 7     | -9.31  | -4.27 | -17.49 | 2.66  | 12.59 | 0.08   | -98.29  |
| 8    |  | oxalic acid                  | C2H2O4     | 89.995    | -29.72 | -0.54   | 57.33  | 67.91     | 6     | 1     | -10.84 | -0.3  | -7.21  | 0.01  | 8.63  | -2.99  | -30.76  |
| 9    |  | undec-2-enal                 | C11H20O    | 168.151   | -28.66 | 4.35    | 14.61  | 215.74    | 32    | 7     | -7.02  | -5.31 | -21.55 | 8.39  | 8.05  | 6.01   | -103.73 |
| 10   |  | undecanedioic acid           | C11H20O4   | 216.136   | -27.67 | 2.84    | 57.28  | 228.96    | 33    | 10    | -10.3  | -4.45 | -15.11 | 4.96  | 13.15 | 0.95   | -104.3  |
| 11   |  | nonanedioic acid             | C9H16O4    | 188.105   | -27.5  | 1.88    | 57.28  | 193.15    | 27    | 8     | -9.26  | -3.6  | -15.77 | 4.6   | 11.98 | 0.51   | -97.71  |
| 12   |  | nonanedioyl chloride         | C9H14Cl2O2 | 224.037   | -26.89 | 3.41    | 27.2   | 215.39    | 27    | 8     | -7.95  | -5.2  | -15.22 | 0.97  | 8.86  | 0.73   | -84.05  |
| 13   |  | dodecanedioic acid           | C12H22O4   | 230.152   | -26.78 | 3.33    | 57.28  | 246.87    | 36    | 11    | -10.29 | -4.75 | -14.3  | 8.79  | 13.02 | 0.55   | -105.11 |
| 14   |  | octanedioyl chloride         | C8H12Cl2O2 | 210.021   | -26.75 | 2.93    | 27.2   | 197.48    | 24    | 7     | -6.86  | -4.86 | -20.67 | 0     | 8.89  | 5.54   | -88.72  |

|    |                                                                                     |                                                                         |           |         |        |      |       |        |    |   |        |       |        |       |       |        |         |
|----|-------------------------------------------------------------------------------------|-------------------------------------------------------------------------|-----------|---------|--------|------|-------|--------|----|---|--------|-------|--------|-------|-------|--------|---------|
| 15 | 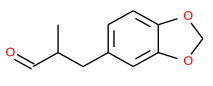   | 3-(7,9-dioxabicyclo[4.3.0]nona-1,3,5-trien-3-yl)-2-methylpropanal       | C11H12O3  | 192.079 | -26    | 2.44 | 30.69 | 198.9  | 26 | 3 | -5.39  | -4.55 | -20.01 | 0.86  | 10.5  | 1.56   | -89.87  |
| 16 |    | octanedioic acid                                                        | C8H14O4   | 174.089 | -25.29 | 1.4  | 57.28 | 175.24 | 24 | 7 | -11.44 | -2.58 | 3.33   | 4.63  | 8.46  | -12.88 | -10.78  |
| 17 |    | alpha-hexyl cinnamaldehyde                                              | C15H22O   | 216.151 | -25.24 | 4.98 | 14.4  | 255.25 | 36 | 6 | -7.27  | -5.93 | -16.17 | 1.27  | 8.88  | 4.58   | -53.42  |
| 18 |    | 3-(4-(2-carboxy-ethyl)-phenyl)-propanoic acid                           | C12H14O4  | 222.089 | -24.98 | 1.81 | 57.01 | 214.27 | 28 | 6 | -9.94  | -3.99 | -14.31 | 1.73  | 12.95 | 5.83   | -102.9  |
| 19 |    | 1,4-diethyl butanedioate                                                | C8H14O4   | 174.089 | -24.57 | 1.12 | 40.83 | 183.64 | 26 | 5 | -7.23  | -4.17 | -11.23 | 3.13  | 7.92  | -1.83  | -41.03  |
| 20 |    | butyric acid                                                            | C4H8O2    | 88.052  | -24.49 | 0.87 | 28.89 | 91.05  | 13 | 2 | -6.83  | -2.04 | -6.89  | 0.68  | 5.02  | -5.93  | -5.17   |
| 21 |    | undec-10-enal                                                           | C11H20O   | 168.151 | -24.27 | 3.96 | 14.61 | 216.02 | 32 | 9 | -5     | -5.39 | -22.33 | 3.14  | 7.65  | 4.81   | -88.66  |
| 22 |   | 3-(4-methoxy-phenyl)-acrylaldehyde                                      | C10H10O2  | 162.068 | -24.26 | 2.38 | 21.89 | 175.81 | 22 | 0 | -4.93  | -4.14 | -17.57 | 0.81  | 8.48  | 3.33   | -84.61  |
| 23 |  | pent-4-enoic acid                                                       | C5H8O2    | 100.052 | -24.2  | 0.97 | 28.89 | 112.8  | 14 | 3 | -6.32  | -2.4  | -10.29 | 2.04  | 5.2   | -3.03  | -8.3    |
| 24 |  | nonanoic acid                                                           | C9H18O2   | 158.131 | -24.19 | 3.28 | 28.89 | 180.58 | 28 | 7 | -6.56  | -4.62 | -16.34 | 3.58  | 9.51  | 0.77   | -110.39 |
| 25 |  | 2-methyl-butanoic acid                                                  | C5H10O2   | 102.068 | -24.18 | 1.19 | 28.92 | 106.24 | 16 | 2 | -6.96  | -2.53 | -5.95  | 1.13  | 5.19  | -6.1   | -11.79  |
| 26 |  | 3-oxo-2-oxabicyclo[4.4.0]deca-1(6),4,7,9-tetraene                       | C9H6O2    | 146.037 | -24.04 | 1.72 | 20.65 | 151.42 | 17 | 0 | -6.55  | -3.41 | -13.62 | 0     | 7.94  | 3.75   | -64.12  |
| 27 |  | dodec-2-enal                                                            | C12H22O   | 182.167 | -23.7  | 4.83 | 14.61 | 233.64 | 35 | 8 | -4.82  | -5.71 | -21.69 | 10.21 | 8.05  | 4.81   | -105.73 |
| 28 |  | 2-(diethyl-(phenyl-methyl)-amino)-1-(2,6-dimethyl-phenylamino)-ethanone | C21H29N2O | 446.257 | -23.57 | 4.91 | 50.12 | 461.02 | 53 | 6 | -2.58  | -6.54 | -18.89 | 1.59  | 1.29  | 2.49   | -71.55  |
| 29 |  | 4-methoxy-phenyl ethanoate                                              | C9H10O3   | 166.063 | -22.85 | 1.68 | 28.53 | 167.45 | 22 | 0 | -4.2   | -4.36 | -18.67 | 0     | 9.71  | 3.16   | -97.52  |

|    |  |                                             |           |         |        |      |       |        |    |   |        |       |        |      |       |       |         |
|----|--|---------------------------------------------|-----------|---------|--------|------|-------|--------|----|---|--------|-------|--------|------|-------|-------|---------|
| 30 |  | phenyl-methyl 2-hydroxy-benzoate            | C14H12O3  | 228.079 | -22.84 | 3.15 | 37.64 | 215.23 | 29 | 2 | -3.09  | -4.83 | -15.95 | 0    | 4.08  | -0.15 | -56.9   |
| 31 |  | (2R,3R,4S)-2,3,4,5-tetrahydroxy-pentanal    | C5H10O5   | 150.053 | -22.84 | -3   | 79.77 | 126.4  | 20 | 8 | -15.85 | -1.21 | -6.83  | 3.44 | 15.61 | 12.7  | -0.96   |
| 32 |  | octanal                                     | C8H16O    | 128.12  | -22.76 | 2.9  | 14.61 | 158.45 | 25 | 6 | -4.96  | -4.17 | -17.6  | 1.71 | 6.92  | 2.1   | -89.01  |
| 33 |  | 5-oxo-nonanedioic acid                      | C9H14O5   | 202.084 | -22.74 | 0.46 | 70.03 | 202.57 | 26 | 8 | -14.24 | -3.12 | -0.16  | 0.38 | 13.34 | 1.1   | -68.79  |
| 34 |  | 6-bromo-hexanoic acid                       | C6H11BrO2 | 193.994 | -22.67 | 2.16 | 28.89 | 146    | 19 | 5 | -5.67  | -3.88 | -15.22 | 1.1  | 8.89  | -0.26 | -85.73  |
| 35 |  | (S)-3,7-dimethyl-oct-6-enal                 | C10H18O   | 154.136 | -22.49 | 3.37 | 14.61 | 198.02 | 29 | 5 | -5.02  | -4.9  | -19.01 | 0    | 7.97  | 5.37  | -91.96  |
| 36 |  | (R)-6-oxo-2-pentyl-3,6-dihydro-2H-pyran     | C10H16O2  | 168.115 | -22.46 | 2.78 | 21.06 | 205.58 | 28 | 4 | -4.44  | -4.97 | -19.67 | 1.65 | 8.97  | 4     | -94.46  |
| 37 |  | 3-(4-hydroxy-3-methoxyphenyl)-acrylaldehyde | C10H10O3  | 178.063 | -22.46 | 2    | 38.52 | 187.24 | 23 | 0 | -4.06  | -3.95 | -21.01 | 0.79 | 9.74  | 6.31  | -92.1   |
| 38 |  | 1,9-dimethyl nonanedioate                   | C11H20O4  | 216.136 | -22.29 | 2.58 | 41.67 | 239.16 | 35 | 8 | -7.05  | -5.69 | -16.2  | 3.49 | 12.09 | 2.57  | -82.82  |
| 39 |  | 5-methyl-2-phenyl-hex-2-enal                | C13H16O   | 188.12  | -22.18 | 3.71 | 14.4  | 216.98 | 30 | 3 | -2.61  | -4.98 | -23.58 | 1.27 | 8.07  | 5.31  | -121.47 |
| 40 |  | 2-hydroxy-benzaldehyde                      | C7H6O2    | 122.037 | -22.08 | 1.27 | 30.95 | 114.6  | 15 | 0 | -3.77  | -2.46 | -15.73 | 2.78 | 5.41  | 1.18  | -77.2   |
| 41 |  | propionic acid                              | C3H6O2    | 74.037  | -22.03 | 0.39 | 28.89 | 73.58  | 10 | 1 | -6.51  | -1.68 | -9.81  | 0    | 4.99  | 1.55  | -12.46  |
| 42 |  | 2-ethoxy-5-(prop-1-enyl)-phenol             | C11H14O2  | 178.099 | -21.67 | 3.39 | 24    | 197.13 | 27 | 1 | -6.59  | -5.22 | -11.56 | 0    | 9.26  | 3.81  | -77.3   |
| 43 |  | 2-phenyl-propanal                           | C9H10O    | 134.073 | -21.63 | 1.73 | 14.4  | 134.9  | 20 | 2 | -4.85  | -3.68 | -18.38 | 0.05 | 7.1   | 7.52  | -97.73  |
| 44 |  | tridec-2-enal                               | C13H24O   | 196.183 | -21.62 | 5.31 | 14.61 | 251.55 | 38 | 9 | -6.99  | -6.12 | -15.25 | 6.62 | 8.08  | 5.99  | -104.79 |

|    |  |                                          |            |         |        |       |       |        |    |    |       |       |        |      |       |       |        |
|----|--|------------------------------------------|------------|---------|--------|-------|-------|--------|----|----|-------|-------|--------|------|-------|-------|--------|
| 45 |  | nonan-2-one                              | C9H18O     | 142.136 | -21.58 | 3.25  | 13.84 | 176.66 | 28 | 6  | -5.07 | -5    | -15.72 | 1.19 | 6.82  | 2.42  | -81.7  |
| 46 |  | methyl 2-phenoxyethanoate                | C9H10O3    | 166.063 | -21.49 | 1.55  | 28.32 | 161.34 | 22 | 3  | -5.83 | -4.3  | -11.89 | 2.57 | 7.66  | 0.72  | -44.59 |
| 47 |  | 2-phenylacetaldehyde                     | C8H8O      | 120.058 | -21.44 | 1.51  | 14.34 | 124.59 | 17 | 2  | -4.93 | -3.24 | -15.5  | 0.07 | 6.54  | 3.92  | -66.84 |
| 48 |  | (4-methoxyphenyl)methanol                | C8H10O2    | 138.068 | -21.18 | 1.37  | 24.9  | 135.9  | 20 | 2  | -2.65 | -3.52 | -14.65 | 1.25 | 4.27  | -2.83 | -30.83 |
| 49 |  | 2-(3-(carboxy-methyl)phenyl)-acetic acid | C10H10O4   | 194.058 | -21.12 | 0.95  | 57.01 | 178.84 | 22 | 4  | -4.85 | -1.82 | -10.59 | 1.02 | 7.55  | -7.74 | -50.83 |
| 50 |  | 11-bromo-undecanoic acid                 | C11H21BrO2 | 264.072 | -21.09 | 4.57  | 28.89 | 235.53 | 34 | 10 | -6.91 | -5.81 | -13.27 | 9.14 | 9.7   | 0.42  | -96.19 |
| 51 |  | 3-phenylallyl 2-methylpropanoate         | C13H16O2   | 204.115 | -21    | 3.42  | 21.29 | 224.76 | 31 | 4  | -3.59 | -5.77 | -16.45 | 2.3  | 5.18  | 3.22  | -29.17 |
| 52 |  | 2,6-diisopropylphenol                    | C12H18O    | 178.136 | -20.98 | 3.59  | 15.72 | 195.09 | 31 | 2  | -2.49 | -5.14 | -13.1  | 1.13 | 1.98  | -1.25 | -39    |
| 53 |  | 1-(thiazol-2-yl)ethanone                 | C5H5NOS    | 127.009 | -20.91 | 0.76  | 24.5  | 109.15 | 13 | 0  | -7.14 | -2.78 | -13.62 | 0.15 | 4.86  | 13.64 | -4.04  |
| 54 |  | 2-mercapto-propanoic acid                | C3H6O2S    | 106.009 | -20.9  | 0.37  | 28.92 | 89.44  | 11 | 2  | -7.22 | -1.3  | -9.84  | 1.19 | 6.78  | 2.71  | -27.77 |
| 55 |  | (S)-dec-1-en-3-ol                        | C10H20O    | 156.151 | -20.84 | 3.77  | 17.13 | 193.6  | 31 | 8  | -3.78 | -5.46 | -22.15 | 5.46 | 9.33  | 4.13  | -97.94 |
| 56 |  | furan-2-ylmethyl isopropyl sulfite       | C8H12O4S   | 204.243 | -20.8  | 0.96  | 39.31 | 169.25 | 25 | 5  | -5.86 | -4.79 | -17.58 | 1.24 | 11.54 | 4.79  | -93.2  |
| 57 |  | 1-(furan-2-yl)ethanone                   | C6H6O2     | 110.037 | -20.75 | 0.83  | 22.64 | 107.73 | 14 | 0  | -7.02 | -2.71 | -13.99 | 0.22 | 4.73  | 14.04 | -3.57  |
| 58 |  | 4-methyl-2,6-ditert-butylphenol          | C15H24O    | 220.183 | -20.64 | 4.99  | 15.72 | 277.97 | 40 | 2  | 0     | -6.27 | -16.37 | 0    | -0.24 | -1.66 | -70.29 |
| 59 |  | propyl hydrogen sulfite                  | C3H8O3S    | 124.159 | -20.6  | -0.24 | 39.46 | 95.44  | 14 | 3  | -7.05 | -2.11 | -12.39 | 0.2  | 6.64  | 6.46  | -6.39  |

|    |                                                                                     |                                      |          |         |        |      |       |        |    |   |       |       |        |      |       |       |         |
|----|-------------------------------------------------------------------------------------|--------------------------------------|----------|---------|--------|------|-------|--------|----|---|-------|-------|--------|------|-------|-------|---------|
| 60 | 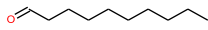   | decanal                              | C10H20O  | 156.151 | -20.55 | 3.87 | 14.61 | 194.27 | 31 | 8 | -4.92 | -4.98 | -17.85 | 3.36 | 7.69  | 3.83  | -89.79  |
| 61 |    | 2-phenyl-but-2-enal                  | C10H10O  | 146.073 | -20.51 | 2.51 | 14.4  | 166.87 | 21 | 1 | -2.67 | -4    | -19.14 | 0    | 7.48  | 2.82  | -83.04  |
| 62 |    | 5-isopropyl-2-methyl-phenol          | C10H14O  | 150.104 | -20.48 | 3    | 16.79 | 160.73 | 25 | 1 | -2.4  | -4.6  | -11.89 | 3.17 | 2.51  | -2.92 | -37.03  |
| 63 |    | methyl 2-hydroxybenzoate             | C8H8O3   | 152.047 | -20.43 | 1.53 | 37.96 | 143.66 | 19 | 0 | -4.27 | -3.5  | -14.65 | 1.53 | 7.38  | 2.79  | -74.03  |
| 64 |    | furan-2-carbaldehyde                 | C5H4O2   | 96.021  | -20.42 | 0.87 | 22.15 | 90.05  | 11 | 0 | -6.67 | -1.84 | -16.48 | 0.05 | 5     | 15.78 | -19.42  |
| 65 |    | 3,5-dimethyl-4-nitrophenol           | C8H9NO3  | 167.162 | -20.37 | 1.83 | 50.64 | 153.25 | 21 | 1 | -2.76 | -3.51 | -13.73 | 0    | 3.16  | -0.43 | -44.45  |
| 66 |    | 4-hydroxy-3,5-dimethoxybenzaldehyde  | C9H10O4  | 182.058 | -20.35 | 1.33 | 45.14 | 178.02 | 23 | 0 | -6.48 | -3.42 | -15.92 | 0    | 10.74 | 9.39  | -53.71  |
| 67 |  | dec-3-en-2-one                       | C10H18O  | 154.136 | -20.25 | 3.47 | 13.84 | 201.86 | 29 | 5 | -2.89 | -5.23 | -20.24 | 0    | 7.38  | 3.43  | -82.71  |
| 68 |  | (2E)-3,7-dimethyl-octa-2,6-dien-1-ol | C10H18O  | 154.136 | -20.25 | 3.33 | 17.17 | 210.16 | 29 | 5 | -2.77 | -4.67 | -15.46 | 0    | 3.19  | -0.08 | -30.79  |
| 69 |  | 2-propyl-phenol                      | C9H12O   | 136.089 | -20.22 | 2.86 | 16.79 | 144.04 | 22 | 2 | -2.85 | -4.09 | -12.89 | 0.75 | 2.48  | -0.66 | -35.78  |
| 70 |  | nonan-2-ol                           | C9H20O   | 144.151 | -20.2  | 3.51 | 16.99 | 173.48 | 30 | 7 | -4.22 | -5.03 | -18.87 | 5.2  | 8.91  | 2.78  | -107.95 |
| 71 |  | 2-methoxy-phenol                     | C7H8O2   | 124.052 | -20.1  | 1.57 | 24.42 | 119.09 | 17 | 0 | -2.36 | -3.5  | -11.75 | 0.46 | 1.1   | -1.29 | -19.76  |
| 72 |  | allyl 2-phenyl-ethanoate             | C11H12O2 | 176.084 | -20.08 | 2.5  | 20.69 | 189.42 | 25 | 4 | -2.05 | -5.13 | -24.7  | 1.97 | 8.65  | 6.62  | -114.24 |
| 73 |  | octan-2-one                          | C8H16O   | 128.12  | -20.06 | 2.77 | 13.84 | 158.75 | 25 | 5 | -5.3  | -4.73 | -13.01 | 0    | 6.87  | 2.11  | -72.6   |
| 74 |  | allyl heptanoate                     | C10H18O2 | 170.131 | -19.94 | 3.41 | 20.96 | 206.86 | 30 | 7 | -3.93 | -5.59 | -20.15 | 1.06 | 9.07  | 4.38  | -115.77 |

|    |  |                                                   |          |         |        |       |       |        |    |    |        |       |        |      |       |       |        |
|----|--|---------------------------------------------------|----------|---------|--------|-------|-------|--------|----|----|--------|-------|--------|------|-------|-------|--------|
| 75 |  | methyl 4-hydroxybenzoate                          | C8H8O3   | 152.047 | -19.91 | 1.65  | 39.03 | 143.03 | 19 | 0  | -5.22  | -3.48 | -14.83 | 0.37 | 10.39 | 4.06  | -66.85 |
| 76 |  | 2-methoxy-4-vinylphenol                           | C9H10O2  | 150.068 | -19.85 | 2.43  | 24.42 | 163.95 | 21 | 0  | -4.67  | -4.32 | -17.37 | 0    | 10.11 | 7.03  | -83.82 |
| 77 |  | (S)-(4-isopropenylcyclohex-1-enyl)methanol        | C10H16O  | 152.12  | -19.81 | 2.85  | 17.55 | 198.5  | 27 | 3  | -3.03  | -3.96 | -13.51 | 1.2  | 3.25  | -0.33 | -26.72 |
| 78 |  | (R)-(4-isopropenylcyclohex-1-enyl)methanol        | C10H16O  | 152.12  | -19.81 | 2.85  | 17.55 | 198.5  | 27 | 3  | -3.03  | -3.95 | -13.48 | 1.21 | 3.25  | -0.4  | -26.58 |
| 79 |  | hexanal                                           | C6H12O   | 100.089 | -19.79 | 1.94  | 14.61 | 122.64 | 19 | 4  | -4.66  | -3.29 | -14.05 | 0.41 | 6.11  | 1.91  | -80.11 |
| 80 |  | 4-allyl-2-methoxyphenol                           | C10H12O2 | 164.084 | -19.77 | 2.61  | 24.42 | 181.27 | 24 | 2  | -1.02  | -4.64 | -17.56 | 0.46 | 3.93  | -1.01 | -45.95 |
| 81 |  | (R)-1-phenylpentan-2-ol                           | C11H16O  | 164.12  | -19.77 | 3.12  | 16.86 | 173    | 28 | 5  | -2.65  | -4.75 | -14.18 | 1.14 | 2.92  | -1.36 | -38.52 |
| 82 |  | (7S,11R,E)-3,7,11,15-tetramethylhexadec-2-en-1-ol | C20H40O  | 296.308 | -19.74 | 8.28  | 17.17 | 372.58 | 61 | 14 | -2.51  | -6.05 | -22.19 | 7.04 | 6.02  | -0.09 | -75.56 |
| 83 |  | pentyl butanoate                                  | C9H18O2  | 158.131 | -19.74 | 3.14  | 20.96 | 185.28 | 29 | 6  | -3.78  | -5.06 | -13.73 | 3.86 | 5.97  | -1.73 | -53.8  |
| 84 |  | ethyl decanoate                                   | C12H24O2 | 200.178 | -19.7  | 4.59  | 20.67 | 238.5  | 38 | 9  | -4.05  | -6.49 | -20.52 | 5.31 | 9.25  | 4.66  | -85.31 |
| 85 |  | 3,7,11-trimethyl-dodeca-2,6,10-trienal            | C15H24O  | 220.183 | -19.63 | 5.48  | 14.61 | 309.85 | 40 | 6  | 0      | -4.79 | -21.92 | 0    | 2.65  | -0.14 | -60.27 |
| 86 |  | 2-phenyl-ethyl 2-methylbut-2-enoate               | C13H16O2 | 204.115 | -19.56 | 3.51  | 21.29 | 230.67 | 31 | 3  | 0      | -5.53 | -17.44 | 0    | 0.66  | -1.08 | -44.87 |
| 87 |  | 2-methoxy-pyrazine                                | C5H6N2O  | 110.048 | -19.55 | 0.11  | 26.25 | 97.1   | 14 | 0  | -7.37  | -2.73 | -15.51 | 0.06 | 6.09  | 17.99 | -12.82 |
| 88 |  | 3-phenyl-prop-2-en-1-ol                           | C9H10O   | 134.073 | -19.53 | 2.12  | 16.89 | 145.12 | 20 | 3  | -4.14  | -4.23 | -14.8  | 0.2  | 8.72  | 0.39  | -75.8  |
| 89 |  | propane-1,2,3-triol                               | C3H8O3   | 92.047  | -19.53 | -1.61 | 51.36 | 81.67  | 14 | 5  | -11.88 | -1.54 | -10.61 | 0.68 | 11.15 | 16.35 | -10.42 |

|     |  |                                                |          |         |        |      |       |        |    |    |       |       |        |      |      |       |         |
|-----|--|------------------------------------------------|----------|---------|--------|------|-------|--------|----|----|-------|-------|--------|------|------|-------|---------|
| 90  |  | methyl 2-methylamino-benzoate                  | C9H11NO2 | 165.079 | -19.5  | 1.63 | 31.37 | 158.05 | 23 | 0  | -0.76 | -4.09 | -15.44 | 0    | 1.11 | -0.37 | -43.85  |
| 91  |  | resorcinol                                     | C6H6O2   | 110.037 | -19.43 | 1.34 | 35.47 | 97.07  | 14 | 0  | -4.42 | -2.28 | -11.63 | 1.12 | 5.82 | 0.85  | -32.3   |
| 92  |  | dodecanal                                      | C12H24O  | 184.183 | -19.39 | 4.83 | 14.61 | 230.08 | 37 | 10 | -3.55 | -5.83 | -22.44 | 8.5  | 8.05 | 5.92  | -120.81 |
| 93  |  | hex-2-enoic acid                               | C6H10O2  | 114.068 | -19.39 | 1.98 | 28.89 | 133.84 | 17 | 3  | -5.49 | -2.73 | -11.85 | 3.28 | 5.25 | 3.71  | -3.02   |
| 94  |  | ((4-methoxy-phenyl)-methoxy)-methanone         | C9H10O3  | 166.063 | -19.3  | 1.63 | 30.11 | 161.45 | 22 | 2  | -3.23 | -3.87 | -19.7  | 0.23 | 9.85 | 3.91  | -86.62  |
| 95  |  | heptan-2-one                                   | C7H14O   | 114.104 | -19.28 | 2.29 | 13.84 | 140.84 | 22 | 4  | -5    | -4.3  | -13.42 | 0    | 6.82 | 3.26  | -64.9   |
| 96  |  | pentanoic acid                                 | C5H10O2  | 102.068 | -19.25 | 1.35 | 28.89 | 108.96 | 16 | 3  | -5.65 | -2.44 | -10.56 | 1.46 | 5.22 | 2.33  | -5.22   |
| 97  |  | 1-(2-amino-phenyl)-ethanone                    | C8H9NO   | 135.068 | -19.21 | 1.04 | 34.16 | 128.19 | 19 | 0  | -4.05 | -3.26 | -12.98 | 0    | 6.26 | 2.28  | -84.16  |
| 98  |  | 3,7-dimethyl-octa-2,6-dienal                   | C10H16O  | 152.12  | -19.21 | 3.49 | 14.61 | 210.36 | 27 | 3  | 0     | -4.07 | -19.59 | 0    | 1.79 | -0.07 | -39.78  |
| 99  |  | allyl 2-methyl-but-2-enoate                    | C8H12O2  | 140.084 | -19.2  | 2.34 | 21.56 | 180.31 | 22 | 2  | 0     | -4.63 | -16.42 | 0    | 1.19 | -2.69 | -23.87  |
| 100 |  | non-3-en-2-one                                 | C9H16O   | 140.12  | -19.18 | 2.99 | 13.84 | 183.95 | 26 | 4  | -3.77 | -4.84 | -14.34 | 0    | 4.68 | 3.08  | -62     |
| 101 |  | (1R,2R,5R)-5-isopropenyl-2-methyl-cyclohexanol | C10H18O  | 154.136 | -19.14 | 2.79 | 16.05 | 185.65 | 29 | 2  | -2.75 | -4.6  | -11.23 | 0    | 2.44 | -1.36 | -29.37  |
| 102 |  | heptyl butanoate                               | C11H22O2 | 186.162 | -19.12 | 4.11 | 20.96 | 221.09 | 35 | 8  | -3.86 | -6.2  | -16.73 | 4.92 | 8.47 | 0.57  | -69.64  |
| 103 |  | (R)-3,7-dimethyl-oct-6-enal                    | C10H18O  | 154.136 | -19.1  | 3.37 | 14.61 | 198.02 | 29 | 5  | -2.93 | -4.61 | -20.04 | 0    | 7.63 | 4.11  | -90.23  |
| 104 |  | 4-vinyl-phenol                                 | C8H8O    | 120.058 | -19.07 | 2.46 | 17.86 | 131.23 | 17 | 0  | -2.9  | -3.23 | -12.24 | 0.55 | 3.17 | 0.46  | -37.96  |

|     |  |                                                                             |            |         |        |      |       |        |    |   |       |       |        |      |      |       |        |
|-----|--|-----------------------------------------------------------------------------|------------|---------|--------|------|-------|--------|----|---|-------|-------|--------|------|------|-------|--------|
| 105 |  | 2-phenyl-ethanol                                                            | C8H10O     | 122.073 | -19.03 | 1.6  | 16.89 | 122.59 | 19 | 3 | -2.86 | -3.45 | -13.63 | 0.01 | 2.91 | 0.26  | -41.49 |
| 106 |  | (1R)-(6-methoxyquinolin-4-yl)((2S,4S,5R)-5-vinylquinuclidin-2-yl)methanol   | C20H24N2O2 | 324.184 | -19.02 | 2.41 | 35.65 | 339.59 | 48 | 4 | -2.43 | -5.9  | -14.63 | 1.31 | 3.72 | 0.79  | -52.76 |
| 107 |  | 4-(hydroxy-methyl)-2-methoxy-phenol                                         | C8H10O3    | 154.063 | -19.02 | 0.99 | 41.53 | 147.33 | 21 | 2 | -3.1  | -3.65 | -13.52 | 1.45 | 3.55 | 1.4   | -49.39 |
| 108 |  | (1R,4R,4aR,6R,8aS)-4,8a,9,9-tetramethyldecahydro-1,6-methanonaphthalen-1-ol | C15H26O    | 222.366 | -19.02 | 4.33 | 15.18 | 288.51 | 42 | 1 | -2.85 | -4.83 | -9.72  | 0    | 2.58 | -2.09 | -41.6  |
| 109 |  | 2-phenyl-ethanamine                                                         | C8H11N     | 121.089 | -19.02 | 1    | 21.39 | 124.65 | 20 | 3 | -2.94 | -3.42 | -14.57 | 0.03 | 3.84 | 0.89  | -39.31 |
| 110 |  | 3,7-dimethyl-octa-2,6-dienyl ethanoate                                      | C12H20O2   | 196.146 | -19.01 | 3.9  | 21.66 | 257.82 | 34 | 5 | -3.67 | -5.8  | -19.06 | 0    | 9.57 | 4.61  | -71.09 |
| 111 |  | 3-(2-methoxy-phenyl)-acrylaldehyde                                          | C10H10O2   | 162.068 | -18.98 | 2.26 | 21.97 | 174.49 | 22 | 0 | 0     | -4.22 | -16.44 | 0.42 | 1.76 | -1.55 | -39.63 |
| 112 |  | 3,7-dimethyl-octa-2,6-dienyl 2-phenyl-ethanoate                             | C18H24O2   | 272.178 | -18.96 | 5.41 | 20.69 | 328.95 | 44 | 7 | 0     | -6.09 | -22.07 | 0    | 1.24 | 3.11  | -98.94 |
| 113 |  | hex-4-en-1-ol                                                               | C6H12O     | 100.089 | -18.96 | 1.69 | 17.17 | 125.51 | 19 | 4 | -4.64 | -3.65 | -14.65 | 0    | 7.69 | 2.57  | -67.5  |
| 114 |  | 4-methyl-phenyl 2-phenyl-ethanoate                                          | C15H14O2   | 226.099 | -18.96 | 3.51 | 20.02 | 227.67 | 31 | 2 | -2.86 | -5.8  | -22.17 | 0    | 9.63 | 8.96  | -65.82 |
| 115 |  | phenol                                                                      | C6H6O      | 94.042  | -18.96 | 1.6  | 17.86 | 86.44  | 13 | 0 | -4.36 | -2.75 | -11.79 | 0.1  | 5.16 | 2.77  | -56.38 |
| 116 |  | oct-2-en-1-ol                                                               | C8H16O     | 128.12  | -18.84 | 2.74 | 17.17 | 163.17 | 25 | 6 | -3.62 | -4.56 | -18.59 | 0.55 | 8.5  | 3.04  | -86.54 |
| 117 |  | (S)-pentan-2-ol                                                             | C5H12O     | 88.089  | -18.79 | 1.58 | 16.99 | 101.85 | 18 | 3 | -4.25 | -3.35 | -10.44 | 0.35 | 5.28 | -1.71 | -63.84 |
| 118 |  | 3-phenyl-propan-1-ol                                                        | C9H12O     | 136.089 | -18.79 | 2.08 | 16.89 | 140.5  | 22 | 4 | -2.68 | -3.71 | -13.61 | 0.59 | 2.82 | -0.67 | -43.49 |
| 119 |  | 4-methyl-1,2-dinitrobenzene                                                 | C7H6N2O4   | 182.033 | -18.77 | 1.59 | 76.16 | 149.24 | 19 | 2 | 0     | -3.24 | -14.43 | 0    | 0    | -5.1  | -36.24 |



|     |  |                                      |          |         |        |      |       |        |    |   |       |       |        |      |       |       |        |
|-----|--|--------------------------------------|----------|---------|--------|------|-------|--------|----|---|-------|-------|--------|------|-------|-------|--------|
| 120 |  | 5-phenylpentan-1-ol                  | C11H16O  | 164.12  | -18.74 | 3.04 | 16.89 | 176.31 | 28 | 6 | -3.89 | -5.06 | -19.31 | 2.27 | 9.17  | 5.02  | -96.16 |
| 121 |  | 5-isopropenyl-2-methylcyclohexanol   | C10H18O  | 154.136 | -18.73 | 2.79 | 16.05 | 185.65 | 29 | 2 | -2.82 | -4.2  | -10.88 | 0    | 2.84  | -1.85 | -32.24 |
| 122 |  | (S)-ethyl 3-hydroxybutanoate         | C6H12O3  | 132.079 | -18.72 | 0.53 | 37.15 | 135.59 | 21 | 4 | -5.52 | -3.53 | -13.2  | 1.63 | 8.99  | 2.54  | -60.74 |
| 123 |  | 3-methylbutan-1-amine                | C5H13N   | 87.105  | -18.62 | 0.83 | 21.67 | 103.75 | 19 | 3 | -4.3  | -3.1  | -13.04 | 2.52 | 7.12  | 0.37  | -61.39 |
| 124 |  | 4-hydroxy-3-methoxybenzaldehyde      | C8H8O3   | 152.047 | -18.59 | 1.36 | 38.58 | 147.35 | 19 | 0 | -5.78 | -3.18 | -14.32 | 6.52 | 11.24 | 6.16  | -72.05 |
| 125 |  | (2Z)-3,7-dimethyl-octa-2,6-dien-1-ol | C10H18O  | 154.136 | -18.56 | 3.33 | 17.17 | 210.16 | 29 | 5 | -4.1  | -4.98 | -18.25 | 0    | 9.27  | 5.22  | -82.02 |
| 126 |  | 2-methoxy-4-propylphenol             | C10H14O2 | 166.099 | -18.52 | 2.95 | 24.42 | 175.79 | 26 | 2 | -0.99 | -4.74 | -16.32 | 0.57 | 3.88  | -0.96 | -50.85 |
| 127 |  | (Z)-hex-3-en-1-ol                    | C6H12O   | 100.089 | -18.5  | 1.61 | 17.17 | 128.54 | 19 | 4 | -4.11 | -3.7  | -14.78 | 0    | 7.85  | 1.3   | -69.86 |
| 128 |  | 3-phenylpropanal                     | C9H10O   | 134.073 | -18.49 | 1.94 | 14.34 | 140.86 | 20 | 3 | -4.36 | -3.8  | -16.65 | 0    | 7.99  | 6.01  | -86.43 |
| 129 |  | (R)-1-phenylpropan-1-ol              | C9H12O   | 136.089 | -18.46 | 2.23 | 16.39 | 136.46 | 22 | 3 | -4.47 | -4.21 | -17.17 | 0.09 | 8.91  | 6.6   | -92.95 |
| 130 |  | (Z)-non-6-enal                       | C9H16O   | 140.12  | -18.45 | 2.92 | 14.61 | 182.63 | 26 | 6 | -3.62 | -4.3  | -17.98 | 0.63 | 7.72  | 3.29  | -90.93 |
| 131 |  | 2-isopropenyl-5-methylcyclohexanol   | C10H18O  | 154.136 | -18.43 | 2.79 | 16.05 | 184.17 | 29 | 2 | -2.51 | -4.57 | -11.85 | 0.45 | 2.64  | -0.53 | -33.76 |
| 132 |  | 3,7-dimethyl-oct-6-en-1-ol           | C10H20O  | 156.151 | -18.42 | 3.51 | 17.17 | 199.03 | 31 | 6 | -2.32 | -4.71 | -13.75 | 0    | 2.87  | -2.11 | -39.31 |
| 133 |  | pentan-2-ol                          | C5H12O   | 88.089  | -18.39 | 1.58 | 16.99 | 101.85 | 18 | 3 | -4.26 | -3.3  | -11.21 | 0.48 | 5.64  | -0.34 | -65.26 |
| 134 |  | 7-methyl-3-methylene-octa-1,6-diene  | C10H16   | 136.125 | -18.39 | 3.91 | 0     | 203.76 | 26 | 3 | 0     | -4.75 | -15.94 | 0    | 0     | -1.63 | -32.55 |

|     |  |                                                 |          |         |        |      |       |        |    |   |       |       |        |      |      |       |         |
|-----|--|-------------------------------------------------|----------|---------|--------|------|-------|--------|----|---|-------|-------|--------|------|------|-------|---------|
| 135 |  | (R)-6-methyl-hept-5-en-2-ol                     | C8H16O   | 128.12  | -18.38 | 2.6  | 16.99 | 163.64 | 25 | 4 | -4.05 | -4.7  | -15.17 | 0    | 8.6  | 2.02  | -89.57  |
| 136 |  | 3-isopropyl-phenol                              | C9H12O   | 136.089 | -18.33 | 2.72 | 17.86 | 139.58 | 22 | 1 | -3.97 | -4.22 | -16.21 | 0.76 | 9    | 5.15  | -94.21  |
| 137 |  | 4-allyl-2-methoxy-phenyl ethanoate              | C12H14O3 | 206.094 | -18.3  | 2.61 | 28.71 | 229.13 | 29 | 2 | 0     | -5.51 | -16.51 | 0    | 2.05 | -1.27 | -41.52  |
| 138 |  | 2-phenyl-ethyl propanoate                       | C11H14O2 | 178.099 | -18.29 | 2.66 | 20.69 | 186.03 | 27 | 4 | -4.06 | -4.82 | -12.8  | 3.84 | 6.96 | 0.59  | -77.26  |
| 139 |  | 2-p-tolyl-acetaldehyde                          | C9H10O   | 134.073 | -18.28 | 1.91 | 14.34 | 145.53 | 20 | 2 | -3.51 | -3.57 | -14.14 | 0    | 5.26 | 3.02  | -66.78  |
| 140 |  | phenyl-methyl butanoate                         | C11H14O2 | 178.099 | -18.28 | 2.84 | 20.77 | 185.62 | 27 | 4 | -3.32 | -5.06 | -13.5  | 1.56 | 6.43 | -0.34 | -61.03  |
| 141 |  | 5-methyl-furan-2-carbaldehyde                   | C6H6O2   | 110.037 | -18.28 | 1.3  | 21.66 | 111.07 | 14 | 0 | -6.43 | -2.31 | -16.2  | 0    | 4.86 | 18.31 | -4.64   |
| 142 |  | (R)-nonan-2-ol                                  | C9H20O   | 144.151 | -18.24 | 3.51 | 16.99 | 173.48 | 30 | 7 | -4.19 | -5.14 | -16.46 | 3.94 | 9.03 | 1.94  | -109.08 |
| 143 |  | (R)-heptan-2-ol                                 | C7H16O   | 116.12  | -18.24 | 2.55 | 16.99 | 137.66 | 24 | 5 | -4.24 | -4.34 | -15.63 | 1.96 | 8.33 | 2.7   | -86.1   |
| 144 |  | 2-aza-bicyclo[4.4.0]deca-1(10),2,4,6,8-pentaene | C9H7N    | 129.058 | -18.23 | 2.3  | 9     | 120.17 | 17 | 0 | -3.07 | -3.89 | -14.97 | 0    | 6.57 | 3.31  | -78.07  |
| 145 |  | acetophenone                                    | C8H8O    | 120.058 | -18.23 | 1.61 | 14.07 | 122.3  | 17 | 1 | -2.92 | -3.51 | -14.25 | 0    | 5.22 | 1.88  | -65.7   |
| 146 |  | (4-methoxy-phenyl)-methyl 2-phenyl-ethanoate    | C16H16O3 | 256.11  | -18.17 | 3.46 | 28.04 | 253.75 | 35 | 4 | -1.72 | -5.6  | -17.71 | 1.89 | 3.78 | 3.68  | -46.5   |
| 147 |  | (4-methoxy-phenyl)-methyl ethanoate             | C10H12O3 | 180.079 | -18.12 | 1.95 | 29.01 | 182.62 | 25 | 2 | -3.57 | -4.74 | -17.72 | 0    | 9.29 | 5.51  | -100.75 |
| 148 |  | phenyl-methanol                                 | C7H8O    | 108.058 | -18.11 | 1.28 | 17.35 | 104.06 | 16 | 2 | -3.68 | -3.23 | -13.36 | 0.42 | 6.56 | 0.92  | -70.17  |
| 149 |  | 7-aza-bicyclo[4.3.0]nona-1(6),2,4,8-tetraene    | C8H7N    | 117.058 | -18.1  | 2.19 | 10.02 | 112.41 | 16 | 0 | -2.21 | -3.39 | -13.68 | 0    | 3.52 | 1.23  | -65.11  |

|     |  |                                                     |          |         |        |       |       |        |    |    |       |       |        |      |       |       |         |
|-----|--|-----------------------------------------------------|----------|---------|--------|-------|-------|--------|----|----|-------|-------|--------|------|-------|-------|---------|
| 150 |  | 3-phenyl-acrylaldehyde                              | C9H8O    | 132.058 | -18.06 | 2.29  | 14.34 | 143.97 | 18 | 1  | -2.62 | -3.75 | -17.24 | 0    | 7.25  | 3.44  | -78.17  |
| 151 |  | phenyl-methyl propanoate                            | C10H12O2 | 164.084 | -18.04 | 2.35  | 20.77 | 168.16 | 24 | 3  | -3.27 | -4.7  | -12.88 | 1.49 | 6.4   | -0.51 | -59.12  |
| 152 |  | dec-9-en-1-ol                                       | C10H20O  | 156.151 | -18.03 | 3.62  | 17.17 | 197.74 | 31 | 9  | -4.13 | -5.4  | -20.66 | 4.26 | 8.63  | 7.3   | -83.82  |
| 153 |  | 2,6,10,10-tetramethyl-1-oxa-spiro[4.5]dec-6-ene     | C13H22O  | 194.167 | -18.01 | 4.33  | 7.79  | 264.86 | 36 | 0  | 0     | -5.1  | -14.21 | 0.05 | 0.74  | -1.44 | -55.1   |
| 154 |  | 2-phenyl-ethyl octanoate                            | C16H24O2 | 248.178 | -17.99 | 5.07  | 20.69 | 275.12 | 42 | 9  | 0     | -5.32 | -22.36 | 6.22 | 3.58  | -0.24 | -72.67  |
| 155 |  | 1-(pyrazin-2-yl)-ethanone                           | C6H6N2O  | 122.048 | -17.95 | -0.38 | 32.63 | 112.49 | 15 | 0  | -8.66 | -2.55 | -10.28 | 0.28 | 6.36  | 16.93 | -12.09  |
| 156 |  | 7-aza-bicyclo[4.3.0]nona-1,3,5,8-tetraene           | C8H7N    | 117.058 | -17.94 | 2.19  | 10.02 | 112.41 | 16 | 0  | -2.17 | -3.41 | -13.73 | 0    | 3.41  | 1.53  | -64.14  |
| 157 |  | 2-ethyl-3-hydroxy-4H-pyran-4-one                    | C7H8O3   | 140.047 | -17.91 | 0.33  | 34.44 | 164.93 | 18 | 1  | -5.08 | -3.47 | -14.8  | 1.4  | 12.16 | 3.55  | -87.78  |
| 158 |  | (S)-3,7-dimethyl-oct-6-en-1-ol                      | C10H20O  | 156.151 | -17.9  | 3.51  | 17.17 | 199.03 | 31 | 6  | -1.65 | -4.95 | -14.02 | 0    | 2.36  | -2.68 | -33.75  |
| 159 |  | 2-methyl-propyl ethanoate                           | C6H12O2  | 116.084 | -17.86 | 1.52  | 21.74 | 129.46 | 20 | 2  | -6.46 | -3.41 | -13.8  | 4.86 | 4.11  | 15.58 | -7.91   |
| 160 |  | (R)-4-hydroxy-2,5-dimethyl-2,3-dihydro-furan-3-one  | C6H8O3   | 128.047 | -17.85 | -0.21 | 36.87 | 140.39 | 17 | 0  | -5.48 | -3.2  | -13.54 | 0.02 | 12.38 | 3.66  | -86.8   |
| 161 |  | (3R,7S,11S)-3,7,11,15-tetramethyl-hexadec-1-en-3-ol | C20H40O  | 296.308 | -17.84 | 8.2   | 16.84 | 380.16 | 61 | 14 | 0     | -7.93 | -20.04 | 8.69 | -2.07 | 1.01  | -134.15 |
| 162 |  | octan-3-one                                         | C8H16O   | 128.12  | -17.84 | 2.78  | 13.27 | 159.96 | 25 | 5  | -3.03 | -4.69 | -17.88 | 0.54 | 7.11  | 3.8   | -91.83  |
| 163 |  | octyl ethanoate                                     | C10H20O2 | 172.146 | -17.83 | 3.61  | 21.66 | 204.15 | 32 | 7  | -3.75 | -5.66 | -16.21 | 0.62 | 8.88  | 1.21  | -79.57  |
| 164 |  | (S)-1,5-dimethyl-1-vinyl-hex-4-enyl ethanoate       | C12H20O2 | 196.146 | -17.81 | 3.54  | 20.24 | 264.72 | 34 | 5  | 0     | -5.63 | -16.23 | 0    | 1.66  | -3.12 | -45.31  |

|     |  |                                          |          |         |        |      |       |        |    |   |       |       |        |      |      |       |         |
|-----|--|------------------------------------------|----------|---------|--------|------|-------|--------|----|---|-------|-------|--------|------|------|-------|---------|
| 165 |  | 4-methoxy-phenol                         | C7H8O2   | 124.052 | -17.78 | 1.69 | 25.4  | 118.29 | 17 | 0 | -5.55 | -3.53 | -12.79 | 0.51 | 10.4 | 5.5   | -80.39  |
| 166 |  | pentane-2,3-dione                        | C5H8O2   | 100.052 | -17.78 | 0.05 | 27.58 | 113.02 | 15 | 2 | -7    | -2.42 | -14.3  | 0    | 5.18 | 16.32 | -16.45  |
| 167 |  | (S)-oct-1-en-3-ol                        | C8H16O   | 128.12  | -17.75 | 2.81 | 17.13 | 157.78 | 25 | 6 | -3.6  | -4.65 | -16.82 | 0.61 | 8.38 | 2.15  | -75.72  |
| 168 |  | hex-2-enal                               | C6H10O   | 98.073  | -17.72 | 1.94 | 14.61 | 126.21 | 17 | 2 | -4.43 | -3.13 | -12.59 | 0.8  | 6.59 | 3.07  | -52.65  |
| 169 |  | (4-methoxy-phenyl)-<br>methyl propanoate | C11H14O3 | 194.094 | -17.69 | 2.44 | 28.32 | 200    | 28 | 3 | -3.54 | -5.22 | -18.01 | 3.11 | 9.02 | 6.38  | -109.55 |
| 170 |  | pent-3-en-2-one                          | C5H8O    | 84.058  | -17.62 | 1.14 | 13.84 | 108.71 | 14 | 0 | -2.9  | -3.18 | -11.93 | 0    | 3.95 | 1.25  | -40.41  |
| 171 |  | 3-methyl-butanoic acid                   | C5H10O2  | 102.068 | -17.62 | 1.19 | 28.89 | 105.34 | 16 | 2 | -5.84 | -2.41 | -9.41  | 1.73 | 5.22 | 4.64  | -13.7   |
| 172 |  | 1-allyl-4-methoxy-<br>benzene            | C10H12O  | 148.089 | -17.61 | 2.99 | 7.78  | 169.84 | 23 | 2 | -2.7  | -5.04 | -16.25 | 0.51 | 6.72 | 3.94  | -81.75  |
| 173 |  | o-cresol                                 | C7H8O    | 108.058 | -17.61 | 1.88 | 16.79 | 107.59 | 16 | 0 | -2.43 | -3.37 | -9.72  | 0    | 2.31 | -1.83 | -24.94  |
| 174 |  | 2-phenyl-ethyl<br>butanoate              | C12H16O2 | 192.115 | -17.6  | 3.14 | 20.69 | 203.5  | 30 | 5 | -3.99 | -5.09 | -12.44 | 3.6  | 6.66 | 0.52  | -80.55  |
| 175 |  | octa-2,4-dienal                          | C8H12O   | 124.089 | -17.59 | 2.57 | 14.61 | 167.67 | 21 | 2 | -2.59 | -4.11 | -17.66 | 0.7  | 7.7  | 3.64  | -65.01  |
| 176 |  | 3-mercapto-3-methyl-<br>butan-1-ol       | C5H12OS  | 120.061 | -17.56 | 1.35 | 17.17 | 130.24 | 19 | 4 | -4.54 | -2.85 | -8.55  | 0.64 | 4.01 | -1.56 | -13.85  |
| 177 |  | 3,7-dimethyl-octa-1,6-<br>dien-3-ol      | C10H18O  | 154.136 | -17.55 | 3.25 | 16.84 | 217.74 | 29 | 5 | -1.56 | -4.99 | -14.54 | 0    | 2.78 | -1.23 | -23.14  |
| 178 |  | ethyl ethanoate                          | C4H8O2   | 88.052  | -17.54 | 0.72 | 21.37 | 96.21  | 14 | 1 | -3.79 | -2.89 | -8.94  | 0    | 4.21 | -1.27 | -1.68   |
| 179 |  | hepta-2,4-dienal                         | C7H10O   | 110.073 | -17.51 | 2.09 | 14.61 | 149.18 | 18 | 1 | -2.65 | -3.63 | -16.43 | 0.23 | 6.84 | 3.51  | -56.63  |

|     |  |                                                                                                |            |         |        |      |       |        |    |   |       |       |        |      |      |       |        |
|-----|--|------------------------------------------------------------------------------------------------|------------|---------|--------|------|-------|--------|----|---|-------|-------|--------|------|------|-------|--------|
| 180 |  | (R)-3,7-dimethyl-oct-6-en-1-ol                                                                 | C10H20O    | 156.151 | -17.5  | 3.51 | 17.17 | 199.03 | 31 | 6 | -2.89 | -4.53 | -12.3  | 0    | 3.15 | -1.22 | -38.97 |
| 181 |  | hexanoic acid                                                                                  | C6H12O2    | 116.084 | -17.5  | 1.84 | 28.89 | 126.86 | 19 | 4 | -6.44 | -2.82 | -4.82  | 4.27 | 5.22 | -1.23 | -15.18 |
| 182 |  | bicyclo[4.4.0]deca-1(10),2,4,6,8-pentaen-3-yl)-2-aza-bicyclo[4.4.0]deca-1(10),2,4,6,8-pentaene | C20H12N2O4 | 344.08  | -17.49 | 3.94 | 73.44 | 306.35 | 36 | 2 | -1.97 | -4.72 | -14.53 | 0    | 5.06 | 0.29  | -71.67 |
| 183 |  | 4-(2,6,6-trimethyl-cyclohex-2-enyl)-but-3-en-2-one                                             | C13H20O    | 192.151 | -17.48 | 4.05 | 13.77 | 264.15 | 34 | 1 | 0     | -5.65 | -13.73 | 0    | 0.23 | -1.12 | -36.65 |
| 184 |  | (furan-2-yl)-methyl heptanoate                                                                 | C12H18O3   | 210.126 | -17.46 | 3.44 | 28.52 | 224.58 | 33 | 7 | 0     | -5.23 | -18.67 | 2.39 | 3.17 | -2.82 | -47.24 |
| 185 |  | hexyl 2-phenyl-ethanoate                                                                       | C14H20O2   | 220.146 | -17.45 | 4.16 | 20.69 | 239.46 | 36 | 7 | -3.11 | -6.53 | -19.67 | 1.46 | 9.92 | 4.28  | -86.96 |
| 186 |  | octan-1-ol                                                                                     | C8H18O     | 130.136 | -17.39 | 3.04 | 17.17 | 158.09 | 27 | 7 | -4.49 | -4.64 | -15.79 | 2.85 | 8.39 | 3.59  | -84.62 |
| 187 |  | (1S,2R,4R)-1,3,3-trimethyl-bicyclo[2.2.1]heptan-2-ol                                           | C10H18O    | 154.136 | -17.38 | 2.75 | 16.59 | 198.5  | 29 | 1 | -2.64 | -4.18 | -9.57  | 0    | 2.69 | -1.42 | -35.51 |
| 188 |  | methyl non-2-enoate                                                                            | C10H18O2   | 170.131 | -17.37 | 3.77 | 21.09 | 212.18 | 30 | 5 | -2.77 | -5.52 | -20.51 | 5.05 | 9.29 | 5.88  | -92.01 |
| 189 |  | (R)-2-oxo-6-(pent-2-enyl)-tetrahydro-2H-pyran                                                  | C10H16O2   | 168.115 | -17.35 | 2.16 | 21.06 | 199.52 | 28 | 3 | -3.29 | -5    | -17.79 | 2.2  | 8.96 | 5.44  | -99.02 |
| 190 |  | phenyl-methyl 3-phenyl-prop-2-enoate                                                           | C16H14O2   | 238.099 | -17.34 | 4.29 | 20.5  | 247.8  | 32 | 3 | 0     | -5.57 | -17.58 | 1.6  | 1.42 | 1.68  | -97.61 |
| 191 |  | dec-2-en-1-ol                                                                                  | C10H20O    | 156.151 | -17.34 | 3.7  | 17.17 | 198.98 | 31 | 8 | -4.46 | -5.39 | -17.68 | 4.96 | 8.56 | 6.09  | -93.87 |
| 192 |  | butan-1-amine                                                                                  | C4H11N     | 73.089  | -17.34 | 0.51 | 21.67 | 88.53  | 16 | 3 | -4.37 | -2.81 | -10.88 | 1.32 | 6.86 | -0.7  | -50.46 |
| 193 |  | 1-methyl-2,3-dinitrobenzene                                                                    | C7H6N2O4   | 182.033 | -17.33 | 1.47 | 75.86 | 149.26 | 19 | 2 | 0     | -3.36 | -13.6  | 0    | 0    | -4.06 | -34.51 |
| 194 |  | (1R,2S,5R)-2-isopropyl-5-methyl-cyclohexanol                                                   | C10H20O    | 156.151 | -17.32 | 2.95 | 16.05 | 180.11 | 31 | 2 | -2.18 | -4.55 | -11.26 | 0.43 | 2.51 | -0.86 | -39.28 |

|     |                                                                                     |                                         |          |         |        |       |       |        |    |   |       |       |        |      |       |       |        |
|-----|-------------------------------------------------------------------------------------|-----------------------------------------|----------|---------|--------|-------|-------|--------|----|---|-------|-------|--------|------|-------|-------|--------|
| 195 | 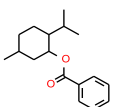   | 2-isopropyl-5-methylcyclohexyl benzoate | C17H24O2 | 260.178 | -17.31 | 5.04  | 20.27 | 278.86 | 43 | 3 | 0     | -6.3  | -13.16 | 0.99 | 0.12  | -2.74 | -64.52 |
| 196 |    | 4-ethyl-2-methoxyphenol                 | C9H12O2  | 152.084 | -17.3  | 2.47  | 24.42 | 158.25 | 23 | 1 | -4.47 | -4.42 | -15.14 | 0.39 | 10.12 | 5.94  | -87.38 |
| 197 |    | butane-1,4-diamine                      | C4H12N2  | 88.1    | -17.3  | -1.25 | 42.82 | 98.57  | 18 | 5 | -6.61 | -2.38 | -11.25 | 1.26 | 11.46 | 1.02  | -47.76 |
| 198 |    | 1-methyl-ethyl 2-methylbut-2-enoate     | C8H14O2  | 142.099 | -17.28 | 2.33  | 20.94 | 173.55 | 24 | 1 | 0     | -4.52 | -13.36 | 0    | 0.02  | -2.28 | -35.84 |
| 199 |    | 2,6-dimethylphenol                      | C8H10O   | 122.073 | -17.28 | 2.16  | 15.72 | 126.7  | 19 | 0 | -2.62 | -3.75 | -9.95  | 0    | 2.05  | 0.41  | -30.63 |
| 200 |    | pentane-1,5-diamine                     | C5H14N2  | 102.116 | -17.27 | -0.76 | 42.82 | 116.48 | 21 | 6 | -6.31 | -2.69 | -13.24 | 4.29 | 12    | 1.73  | -49.69 |
| 201 |   | pentyl hexanoate                        | C11H22O2 | 186.162 | -17.26 | 4.11  | 20.96 | 221.09 | 35 | 8 | -2.52 | -5.43 | -21.72 | 3.14 | 9.07  | 4.37  | -123.2 |
| 202 |  | 3,4-dimethoxybenzaldehyde               | C9H10O3  | 166.063 | -17.26 | 1.71  | 29.66 | 167.35 | 22 | 0 | 0     | -3.64 | -17.47 | 0.09 | 2.93  | 0.7   | -43.37 |
| 203 |  | benzoic acid                            | C7H6O2   | 122.037 | -17.23 | 1.56  | 28.65 | 109    | 14 | 1 | -6.26 | -2.35 | -5.83  | 0.31 | 5.22  | 2.28  | 0.36   |
| 204 |  | 2-methoxy-4-methylphenol                | C8H10O2  | 138.068 | -17.19 | 1.97  | 24.42 | 140.11 | 20 | 0 | -4.42 | -4.08 | -15.32 | 0    | 10.12 | 6.74  | -83.98 |
| 205 |  | dodeca-2,4-dienal                       | C12H20O  | 180.151 | -17.18 | 4.5   | 14.61 | 239.29 | 33 | 6 | -1.69 | -5.88 | -23.07 | 0.69 | 8.38  | 6.41  | -73.62 |
| 206 |  | 1-methoxy-4-(prop-1-enyl)benzene        | C10H12O  | 148.089 | -17.18 | 3.29  | 7.78  | 167.14 | 23 | 0 | 0     | -4.58 | -13.78 | 0    | 0.59  | -1.17 | -30.8  |
| 207 |  | 4-ethoxybenzaldehyde                    | C9H10O2  | 150.068 | -17.16 | 2.22  | 21.52 | 154.49 | 21 | 1 | -2.82 | -3.93 | -17.88 | 0.3  | 8.87  | 4.93  | -74.48 |
| 208 |  | 2-methyl-1,3-dinitrobenzene             | C7H6N2O4 | 182.033 | -17.16 | 1.47  | 76.16 | 150.2  | 19 | 2 | 0     | -3.03 | -14.3  | 0    | 0     | -3.08 | -39.5  |
| 209 |  | 2-phenylethyl ethanoate                 | C10H12O2 | 164.084 | -17.14 | 2.17  | 21.39 | 168.65 | 24 | 3 | 0     | -4.65 | -16.53 | 0    | 1.04  | -0.1  | -39.96 |

|     |  |                                                                                   |          |         |        |      |       |        |    |   |       |       |        |      |      |       |         |
|-----|--|-----------------------------------------------------------------------------------|----------|---------|--------|------|-------|--------|----|---|-------|-------|--------|------|------|-------|---------|
| 210 |  | (S)-2,6-dimethyl-oct-7-en-2-ol                                                    | C10H20O  | 156.151 | -17.12 | 3.45 | 16.7  | 202.43 | 31 | 6 | -1.38 | -5.12 | -15.2  | 1.89 | 2.87 | -1.14 | -21.02  |
| 211 |  | p-cresol                                                                          | C7H8O    | 108.058 | -17.1  | 2    | 17.86 | 107.38 | 16 | 0 | -2.77 | -2.87 | -10.69 | 0    | 3.18 | 0.2   | -31.33  |
| 212 |  | allyl furan-2-carboxylate                                                         | C8H8O3   | 152.047 | -17.08 | 1.89 | 29.86 | 157    | 19 | 2 | 0     | -4.09 | -15.97 | 0.7  | 1.93 | -1.53 | -37.87  |
| 213 |  | 4-propyl-benzaldehyde                                                             | C10H12O  | 148.089 | -17.06 | 3.03 | 14.4  | 160.7  | 23 | 2 | -2.65 | -4.11 | -17.89 | 1.23 | 7.76 | 4.97  | -89.07  |
| 214 |  | oct-1-en-3-ol                                                                     | C8H16O   | 128.12  | -17.03 | 2.81 | 17.13 | 157.78 | 25 | 6 | -3.45 | -4.64 | -16.8  | 1.02 | 8.38 | 2.63  | -76.39  |
| 215 |  | m-cresol                                                                          | C7H8O    | 108.058 | -16.99 | 2    | 17.86 | 107.46 | 16 | 0 | -2.18 | -3.01 | -11.82 | 0    | 3.17 | -0.02 | -39.08  |
| 216 |  | diethylamino-m-tolyl-methanone                                                    | C12H17NO | 191.131 | -16.96 | 2.7  | 16.17 | 216.2  | 31 | 3 | 0     | -5.49 | -14.84 | 0    | 1.39 | -1.96 | -52.1   |
| 217 |  | (3S,3aR,7R,8aS)-3,6,8,8-tetramethyl-2,3,4,7,8,8a-hexahydro-1H-3a,7-methanoazulene | C15H24   | 204.351 | -16.91 | 5.28 | 0     | 276.98 | 39 | 0 | 0     | -5.29 | -12.52 | 0.01 | 0    | -1.29 | -50.83  |
| 218 |  | (Z)-dec-4-enal                                                                    | C10H18O  | 154.136 | -16.89 | 3.4  | 14.61 | 201.12 | 29 | 7 | -2.82 | -4.79 | -19.87 | 0.39 | 7.96 | 4.76  | -100.6  |
| 219 |  | methyl butanoate                                                                  | C5H10O2  | 102.068 | -16.89 | 1.22 | 21.09 | 114.05 | 17 | 2 | -3.91 | -3.29 | -8.1   | 0.32 | 4.42 | -1.85 | -6.58   |
| 220 |  | 1-methyl-ethyl 2-phenyl-ethanoate                                                 | C11H14O2 | 178.099 | -16.88 | 2.49 | 20.08 | 182.66 | 27 | 3 | -3.07 | -5.28 | -19.24 | 2.52 | 8.8  | 8     | -127.64 |
| 221 |  | hexan-3-one                                                                       | C6H12O   | 100.089 | -16.87 | 1.82 | 13.27 | 124.15 | 19 | 3 | -3.76 | -3.69 | -10.82 | 0    | 4.47 | 1.18  | -55.66  |
| 222 |  | ethyl 2-phenyl-ethanoate                                                          | C10H12O2 | 164.084 | -16.85 | 2.23 | 20.4  | 167.34 | 24 | 3 | -3.95 | -4.62 | -9.57  | 1.57 | 5.12 | 0.26  | -32.45  |
| 223 |  | (S)-4-isopropenyl-1-methyl-cyclohex-1-ene                                         | C10H16   | 136.125 | -16.85 | 3.83 | 0     | 195.06 | 26 | 1 | 0     | -4.77 | -13.65 | 0    | 0    | -0.91 | -29.4   |
| 224 |  | propane-1,3-dithiol                                                               | C3H8S2   | 108.007 | -16.82 | 1.8  | 0     | 90.74  | 13 | 4 | -4.35 | -2.24 | -8.22  | 0.05 | 3.29 | -1.46 | -15.78  |

|     |                                                                                     |                                                       |          |         |        |      |       |        |    |   |       |       |        |      |       |       |         |
|-----|-------------------------------------------------------------------------------------|-------------------------------------------------------|----------|---------|--------|------|-------|--------|----|---|-------|-------|--------|------|-------|-------|---------|
| 225 | 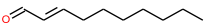   | dec-2-enal                                            | C10H18O  | 154.136 | -16.8  | 3.87 | 14.61 | 197.83 | 29 | 6 | -2.87 | -4.84 | -20.35 | 2.9  | 8.03  | 6.71  | -88.69  |
| 226 |    | 4-butyl-benzaldehyde                                  | C11H14O  | 162.104 | -16.8  | 3.51 | 14.4  | 178.6  | 26 | 3 | -3.49 | -4.53 | -15.96 | 2.65 | 7.49  | 5.48  | -73.27  |
| 227 |    | (S)-octan-2-ol                                        | C8H18O   | 130.136 | -16.79 | 3.03 | 16.99 | 155.57 | 27 | 6 | -4.16 | -4.73 | -13.67 | 2.05 | 8.53  | 0.89  | -94.04  |
| 228 |    | 4-isopropyl-benzaldehyde                              | C10H12O  | 148.089 | -16.78 | 2.77 | 14.4  | 157.14 | 23 | 1 | -2.66 | -4.11 | -18.01 | 0.23 | 7.95  | 6.28  | -82.93  |
| 229 |    | (1,5-dimethyl-1-vinyl-hex-4-enyloxy)-methanone        | C11H18O2 | 182.131 | -16.77 | 3.22 | 20.88 | 244.51 | 31 | 5 | 0     | -5.16 | -15.68 | 0    | 0.53  | -1.57 | -49.78  |
| 230 |    | (1S,2R)-5-isopropyl-2-methyl-cyclohexanol             | C10H20O  | 156.151 | -16.77 | 2.95 | 16.05 | 179.36 | 31 | 2 | -2.04 | -4.22 | -11.62 | 0.86 | 3.08  | -1    | -40.79  |
| 231 |    | phenoxy-benzene                                       | C12H10O  | 170.073 | -16.75 | 3.3  | 6.99  | 165.46 | 23 | 2 | 0     | -4.76 | -15.12 | 0    | 1.22  | -0.84 | -51.55  |
| 232 |   | phenyl-methyl ethanoate                               | C9H10O2  | 150.068 | -16.73 | 1.86 | 21.47 | 150.77 | 21 | 2 | -2.9  | -4.32 | -17.67 | 0    | 8.04  | 5.98  | -85.62  |
| 233 |  | 4-methoxy-benzaldehyde                                | C8H8O2   | 136.052 | -16.71 | 1.74 | 21.94 | 135.92 | 18 | 0 | -2.64 | -3.48 | -16.92 | 0    | 9.15  | 3.59  | -73.97  |
| 234 |  | non-2-en-1-ol                                         | C9H18O   | 142.136 | -16.7  | 3.22 | 17.17 | 181.08 | 28 | 7 | -2.29 | -4.83 | -14.18 | 2.58 | 3.27  | -0.21 | -15.68  |
| 235 |  | (2S,3S)-ethyl 3-methyl-3-phenyl-oxirane-2-carboxylate | C12H14O3 | 206.094 | -16.69 | 2.59 | 28.74 | 221.12 | 29 | 3 | -3.15 | -5.01 | -18.18 | 0.82 | 10.71 | 4.5   | -121.56 |
| 236 |  | 3,7-dimethyl-oct-6-enyl pentanoate                    | C15H28O2 | 240.209 | -16.69 | 5.54 | 20.96 | 297.84 | 45 | 9 | -3.6  | -6.53 | -17.09 | 4.05 | 9.29  | 2.32  | -88.68  |
| 237 |  | pentan-1-ol                                           | C5H12O   | 88.089  | -16.69 | 1.59 | 17.17 | 104.37 | 18 | 4 | -3.67 | -3.25 | -11.32 | 0.67 | 5.52  | -0.66 | -53.93  |
| 238 |  | ethyl hexanoate                                       | C8H16O2  | 144.115 | -16.67 | 2.66 | 20.67 | 166.87 | 26 | 5 | -3.26 | -4.86 | -17.06 | 0    | 8.51  | 3.81  | -84.94  |
| 239 |  | 1-methyl-3-nitro-benzene                              | C7H7NO2  | 137.048 | -16.67 | 1.99 | 38.5  | 122.54 | 17 | 1 | 0     | -3.15 | -14.37 | 0    | 0     | -1.19 | -38.84  |



|     |                                                                                     |                                             |           |         |        |       |       |        |    |   |       |       |        |      |       |       |         |
|-----|-------------------------------------------------------------------------------------|---------------------------------------------|-----------|---------|--------|-------|-------|--------|----|---|-------|-------|--------|------|-------|-------|---------|
| 240 | 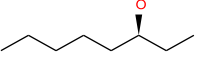   | (S)-octan-3-ol                              | C8H18O    | 130.136 | -16.66 | 3.12  | 17.13 | 155.4  | 27 | 6 | -4.49 | -4.88 | -16.68 | 2.71 | 9.03  | 6.48  | -91.98  |
| 241 |    | (S)-2-amino-4-methyl-pentanoic acid         | C6H13NO2  | 132.102 | -16.65 | -0.47 | 49.71 | 133.58 | 23 | 5 | -6.72 | -2.73 | -16.52 | 0.64 | 13.44 | 8.53  | -72.29  |
| 242 |    | 4-oxo-pentanoic acid                        | C5H8O3    | 117.055 | -16.65 | -0.08 | 42.23 | 117.6  | 17 | 4 | -6.54 | -2.4  | -15.6  | 0    | 8.95  | 12.12 | -61.52  |
| 243 |    | 3-methyl-but-2-en-1-ol                      | C5H10O    | 86.073  | -16.65 | 1.33  | 17.17 | 110.67 | 16 | 2 | -4.03 | -3.21 | -10.82 | 0    | 6.57  | 0.59  | -52.2   |
| 244 |    | 2-methyl-pentanal                           | C6H12O    | 100.089 | -16.63 | 1.78  | 14.67 | 117.26 | 19 | 3 | -3.94 | -3.25 | -10.47 | 0.65 | 5.18  | 0.45  | -56.18  |
| 245 |    | 2-pentyl-furan                              | C9H14O    | 138.104 | -16.6  | 3.36  | 7.99  | 153.57 | 24 | 4 | -2.85 | -4.94 | -18.22 | 0.97 | 7.45  | 6.28  | -95.05  |
| 246 |    | heptan-3-one                                | C7H14O    | 114.104 | -16.6  | 2.3   | 13.27 | 142.06 | 22 | 4 | -2.92 | -4.08 | -13.78 | 0.75 | 4.65  | 2.12  | -58.53  |
| 247 |   | 2-phenyl-ethyl 3-methyl-butanoate           | C13H18O2  | 206.131 | -16.6  | 3.47  | 20.69 | 217.78 | 33 | 5 | 0     | -5.22 | -16.15 | 1.15 | 1.38  | -1.5  | -47.05  |
| 248 |  | (R)-2,6-diamino-hexanoic acid               | C6H14N2O2 | 147.113 | -16.59 | -2.07 | 70.86 | 144.8  | 25 | 8 | -9.98 | -2.44 | -19.98 | 0.9  | 20.95 | 14.78 | -81.8   |
| 249 |  | 5-methyl-2-tert-butyl-phenol                | C11H16O   | 164.12  | -16.59 | 3.49  | 16.79 | 193.7  | 28 | 1 | -2.25 | -4.89 | -10.15 | 0.75 | 2.31  | 0.28  | -41.13  |
| 250 |  | undecan-2-one                               | C11H22O   | 170.167 | -16.58 | 4.22  | 13.84 | 212.47 | 34 | 8 | -3.8  | -5.9  | -18.64 | 5.54 | 7.96  | 7.39  | -105.37 |
| 251 |  | 2-methoxy-benzaldehyde                      | C8H8O2    | 136.052 | -16.58 | 1.62  | 22.03 | 134.6  | 18 | 0 | -3.65 | -3.55 | -14.54 | 0.48 | 8.65  | 4.67  | -82.43  |
| 252 |  | 4-ethyl-benzaldehyde                        | C9H10O    | 134.073 | -16.58 | 2.55  | 14.4  | 143.16 | 20 | 1 | 0     | -3.14 | -16.53 | 0.18 | 1.77  | 0.2   | -44.05  |
| 253 |  | oct-3-en-2-one                              | C8H14O    | 126.104 | -16.57 | 2.5   | 13.84 | 166.04 | 23 | 3 | -2.86 | -4.52 | -16.49 | 0    | 6.9   | 4.85  | -71.06  |
| 254 |  | (R)-5-isopropenyl-2-methyl-cyclohex-2-enone | C10H14O   | 150.104 | -16.55 | 2.52  | 13.68 | 206.18 | 25 | 1 | 0     | -4.63 | -13.88 | 0.2  | 0.97  | -1.35 | -36.08  |

|     |  |                                                          |          |         |        |      |       |        |    |   |       |       |        |      |      |       |         |
|-----|--|----------------------------------------------------------|----------|---------|--------|------|-------|--------|----|---|-------|-------|--------|------|------|-------|---------|
| 255 |  | 3-ethoxy-4-hydroxy-benzaldehyde                          | C9H10O3  | 166.063 | -16.54 | 1.84 | 38.16 | 165.91 | 22 | 1 | 0     | -3.51 | -17.12 | 0.52 | 2.11 | 1.14  | -45.74  |
| 256 |  | 7-methyl-bicyclo[4.3.0]nona-1,3,5,7-tetraene             | C10H10   | 130.078 | -16.53 | 3.48 | 0     | 157.79 | 20 | 0 | 0     | -4.21 | -12.75 | 0    | 0    | -1.46 | -41.64  |
| 257 |  | phenyl-methyl 2-phenyl-ethanoate                         | C15H14O2 | 226.099 | -16.52 | 3.37 | 20.5  | 221.9  | 31 | 4 | 0     | -5.24 | -17.64 | 0.21 | 1.22 | 1.98  | -95.18  |
| 258 |  | pent-2-enal                                              | C5H8O    | 84.058  | -16.51 | 1.46 | 14.61 | 107.72 | 14 | 1 | -2.68 | -2.67 | -12.41 | 0.27 | 3.78 | 1.54  | -54.7   |
| 259 |  | 2,6,6-trimethyl-cyclohexa-1,3-dienecarbaldehyde          | C10H14O  | 150.104 | -16.5  | 2.72 | 14.59 | 216.78 | 25 | 0 | 0     | -3.97 | -15.15 | 0.55 | 1.7  | 0.05  | -36.26  |
| 260 |  | (R)-ethyl 3-hydroxy-butanoate                            | C6H12O3  | 132.079 | -16.5  | 0.53 | 37.15 | 135.59 | 21 | 4 | -2.54 | -3.39 | -12.28 | 0    | 4.54 | -2.01 | -28.91  |
| 261 |  | ethyl propanoate                                         | C5H10O2  | 102.068 | -16.48 | 1.22 | 20.67 | 113.59 | 17 | 2 | -3.61 | -3.4  | -9.82  | 2.24 | 4.24 | 0.55  | -20.03  |
| 262 |  | 2-phenyl-ethyl hexanoate                                 | C14H20O2 | 220.146 | -16.46 | 4.11 | 20.69 | 239.31 | 36 | 7 | -2.95 | -5.69 | -19.01 | 6.25 | 8.65 | 4.74  | -112.76 |
| 263 |  | ethyl 3-hydroxy-butanoate                                | C6H12O3  | 132.079 | -16.44 | 0.53 | 37.15 | 135.59 | 21 | 4 | -8.68 | -3.17 | -9.91  | 5.11 | 7.41 | 14.54 | -0.29   |
| 264 |  | 2,6,6-trimethyl-cyclohex-1-enecarbaldehyde               | C10H16O  | 152.12  | -16.42 | 3.06 | 14.59 | 210.5  | 27 | 0 | -4.2  | -4.3  | -10.87 | 1.18 | 7.37 | 3.68  | -98.24  |
| 265 |  | (1-methyl-1-(4-methyl-cyclohex-4-enyl)-ethoxy)-methanone | C11H18O2 | 182.131 | -16.4  | 2.93 | 21.02 | 228.59 | 31 | 2 | 0     | -4.64 | -14.77 | 2.44 | 1.27 | -1.02 | -44.35  |
| 266 |  | oct-1-en-3-one                                           | C8H14O   | 126.104 | -16.38 | 2.6  | 13.27 | 163.66 | 23 | 4 | -2.49 | -4.76 | -17.62 | 0.86 | 7.41 | 4.2   | -84.37  |
| 267 |  | methyl 2-phenyl-ethanoate                                | C9H10O2  | 150.068 | -16.37 | 1.75 | 20.82 | 150.33 | 21 | 2 | -3.24 | -4.22 | -12.4  | 0.55 | 7.06 | 0.85  | -62.75  |
| 268 |  | 3-(4-(2-carboxy-vinyl)-phenyl)-acrylic acid              | C12H10O4 | 218.058 | -16.36 | 2.8  | 57.01 | 227.31 | 24 | 2 | -1.91 | -3.42 | -14.23 | 0    | 6.16 | -1.27 | -42.96  |
| 269 |  | 5-isopropenyl-2-methyl-cyclohex-2-enone                  | C10H14O  | 150.104 | -16.35 | 2.52 | 13.68 | 206.18 | 25 | 1 | 0     | -4.61 | -14.35 | 0    | 1.01 | -0.42 | -31.04  |

|     |  |                                    |            |         |        |      |       |        |    |    |       |       |        |      |       |       |         |
|-----|--|------------------------------------|------------|---------|--------|------|-------|--------|----|----|-------|-------|--------|------|-------|-------|---------|
| 270 |  | non-2-enal                         | C9H16O     | 140.12  | -16.34 | 3.38 | 14.61 | 179.93 | 26 | 5  | -2.9  | -4.5  | -18.95 | 2.13 | 7.95  | 6.04  | -86.55  |
| 271 |  | nona-2,6-dienal                    | C9H14O     | 138.104 | -16.34 | 2.92 | 14.61 | 186.2  | 24 | 4  | 0     | -4    | -17.77 | 0.82 | 1.79  | 0.54  | -33.66  |
| 272 |  | 2-ethoxy-thiazole                  | C5H7NOS    | 129.025 | -16.34 | 1.62 | 19.59 | 112.23 | 15 | 1  | 0     | -3.76 | -13.76 | 0.17 | 1.71  | -2.94 | -26.64  |
| 273 |  | 2-isopropyl-5-methyl-cyclohexanol  | C10H20O    | 156.151 | -16.31 | 2.95 | 16.05 | 180.11 | 31 | 2  | -1.84 | -4.59 | -11.24 | 0.21 | 2.74  | -0.91 | -37.61  |
| 274 |  | 1-(pyridin-2-yl)-ethanone          | C7H7NO     | 121.053 | -16.3  | 0.67 | 23.11 | 117.02 | 16 | 0  | -6.6  | -2.94 | -10.92 | 0.02 | 4.68  | 14.81 | 3.17    |
| 275 |  | (S)-1-styryl-hexyl ethanoate       | C16H22O2   | 246.162 | -16.28 | 4.98 | 20.54 | 278.51 | 40 | 7  | 0     | -6.45 | -19.19 | 0    | 1.45  | 2.94  | -108.71 |
| 276 |  | 2-methyl-pentanoic acid            | C6H12O2    | 116.084 | -16.26 | 1.67 | 28.92 | 124.09 | 19 | 3  | -5.45 | -2.86 | -7.23  | 1.22 | 5.2   | 1.46  | -16.43  |
| 277 |  | 2-methyl-propyl 2-phenyl-ethanoate | C12H16O2   | 192.115 | -16.25 | 3.03 | 20.77 | 200.59 | 30 | 4  | 0     | -5.56 | -14.9  | 0.58 | 1.95  | -2.26 | -52.48  |
| 278 |  | (4-isopropyl-phenyl)-methanol      | C10H14O    | 150.104 | -16.24 | 2.4  | 17.35 | 157.12 | 25 | 3  | -3.79 | -4.71 | -15.33 | 0.53 | 9.38  | 4.56  | -90.89  |
| 279 |  | hept-2-enal                        | C7H12O     | 112.089 | -16.24 | 2.42 | 14.61 | 144.11 | 20 | 3  | -2.86 | -3.7  | -16.53 | 0    | 7.09  | 4.4   | -80.91  |
| 280 |  | 2-phenyl-acetic acid               | C8H8O2     | 137.06  | -16.24 | 1.4  | 28.62 | 127.33 | 19 | 3  | -2.36 | -3.13 | -14.19 | 0.97 | 3.76  | 2.12  | -47.96  |
| 281 |  | 12-bromo-dodecanoic acid           | C12H23BrO2 | 278.088 | -16.14 | 5.05 | 28.89 | 253.44 | 37 | 11 | -6.84 | -6.26 | -10.81 | 9.58 | 10.36 | 2.73  | -105.95 |
| 282 |  | 2-methyl-pent-2-enoic acid         | C6H10O2    | 114.068 | -16.07 | 1.64 | 28.92 | 136.54 | 17 | 2  | -6.38 | -2.74 | -4.46  | 0    | 5.24  | 1.86  | -4.97   |
| 283 |  | undecanal                          | C11H22O    | 170.167 | -16.06 | 4.35 | 14.61 | 212.17 | 34 | 9  | -2.81 | -5.43 | -21.14 | 6.29 | 8.02  | 6.69  | -118.36 |
| 284 |  | 3-methyl-but-2-enyl ethanoate      | C7H12O2    | 128.084 | -16.05 | 1.91 | 21.66 | 158.33 | 21 | 2  | 0     | -4.3  | -13.64 | 0    | 1.32  | -2.59 | -30.7   |

|     |                                                                                     |                                                          |          |         |        |       |       |        |    |   |       |       |        |      |       |       |         |
|-----|-------------------------------------------------------------------------------------|----------------------------------------------------------|----------|---------|--------|-------|-------|--------|----|---|-------|-------|--------|------|-------|-------|---------|
| 285 | 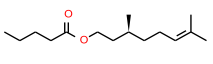   | (S)-3,7-dimethyl-oct-6-enyl pentanoate                   | C15H28O2 | 240.209 | -16.04 | 5.54  | 20.96 | 297.84 | 45 | 9 | -3.59 | -6.55 | -15.34 | 0    | 9.31  | 0.6   | -76.09  |
| 286 |    | (S)-2-methyl-pentanal                                    | C6H12O   | 100.089 | -16.02 | 1.78  | 14.67 | 117.26 | 19 | 3 | -4.49 | -3.39 | -13.88 | 1.39 | 7.47  | 6.21  | -73.84  |
| 287 |    | (Z)-hept-3-en-1-ol                                       | C7H14O   | 114.104 | -16    | 2.09  | 17.17 | 147.03 | 22 | 5 | -2.23 | -3.74 | -12.62 | 0.07 | 3.2   | -0.98 | -11.03  |
| 288 |    | (R)-pyrrolidine-2-carboxylic acid                        | C5H9NO2  | 116.071 | -15.98 | -0.82 | 41.32 | 113.22 | 18 | 2 | -4.83 | -2.41 | -13.12 | 2.07 | 8.53  | 5.09  | -65.28  |
| 289 |    | 1-methoxy-2-methyl-benzene                               | C8H10O   | 122.073 | -15.98 | 2.23  | 7.87  | 127.59 | 19 | 0 | 0     | -3.98 | -12.76 | 0.05 | 0.57  | -1.48 | -42.25  |
| 290 |    | propoxy-methanone                                        | C4H8O2   | 88.052  | -15.97 | 0.88  | 22.76 | 93.44  | 14 | 2 | -5.09 | -2.33 | -6.62  | 1.3  | 4.29  | 1.03  | -13.94  |
| 291 |    | biacetyl                                                 | C4H6O2   | 86.037  | -15.95 | -0.45 | 28.16 | 95.8   | 12 | 1 | -7.43 | -2    | -10.75 | 0    | 5.23  | 15.78 | -11.08  |
| 292 |   | phenyl-methyl 3-methyl-butanoate                         | C12H16O2 | 192.115 | -15.92 | 3.16  | 20.77 | 199.91 | 30 | 4 | 0     | -5.37 | -15.49 | 0.24 | 2.04  | -1.14 | -61.83  |
| 293 |  | 4-(4-hydroxy-4-methyl-pentyl)-cyclohex-1-enecarbaldehyde | C13H22O2 | 210.162 | -15.9  | 3.69  | 30.78 | 268.82 | 37 | 5 | -6.58 | -5.11 | -7.8   | 3.45 | 11.01 | 1.08  | -117.04 |
| 294 |  | 1,7,7-trimethyl-bicyclo[2.2.1]heptan-2-yl propanoate     | C13H22O2 | 210.162 | -15.89 | 3.69  | 20.59 | 262.08 | 37 | 2 | 0     | -4.98 | -14.62 | 1.4  | 1.34  | -0.2  | -49.41  |
| 295 |  | (2R,3S)-ethyl 3-phenyl-oxirane-2-carboxylate             | C11H12O3 | 192.079 | -15.88 | 2.15  | 29.44 | 192.59 | 26 | 3 | -3.35 | -4.78 | -13.63 | 0.66 | 7.02  | 3.57  | -54.11  |
| 296 |  | (S)-2-(4-methyl-cyclohex-3-enyl)-propan-2-ol             | C10H18O  | 154.136 | -15.88 | 2.95  | 16.15 | 205.6  | 29 | 2 | 0     | -4.46 | -12.22 | 0    | -0.24 | -2.56 | -42.74  |
| 297 |  | (S)-5-isopropenyl-2-methyl-cyclohex-2-enone              | C10H14O  | 150.104 | -15.86 | 2.52  | 13.68 | 206.18 | 25 | 1 | 0     | -4.21 | -12.44 | 0.27 | 1.32  | -3.31 | -27.72  |
| 298 |  | 1-hydroxy-decan-3-one                                    | C10H20O2 | 172.146 | -15.8  | 2.59  | 29.92 | 203.32 | 32 | 9 | -2.45 | -5.17 | -12.27 | 0    | 2.98  | -2.26 | -41.06  |
| 299 |  | oct-2-enal                                               | C8H14O   | 126.104 | -15.79 | 2.9   | 14.61 | 162.02 | 23 | 4 | -2.5  | -4.13 | -15.85 | 1.22 | 6.97  | 2.32  | -77     |

|     |                                                                                     |                                                                                            |             |         |        |       |       |        |    |    |       |       |        |      |       |       |         |
|-----|-------------------------------------------------------------------------------------|--------------------------------------------------------------------------------------------|-------------|---------|--------|-------|-------|--------|----|----|-------|-------|--------|------|-------|-------|---------|
| 300 | 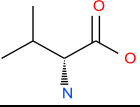   | (R)-2-amino-3-methylbutanoic acid                                                          | C5H11NO2    | 118.087 | -15.78 | -1.02 | 49.89 | 117.73 | 20 | 4  | -7.38 | -2.35 | -11.46 | 1.45 | 13.66 | 4.97  | -58.37  |
| 301 |    | 4-isopropylphenol                                                                          | C9H12O      | 136.089 | -15.76 | 2.72  | 17.86 | 139.51 | 22 | 1  | -2.77 | -3.46 | -11.27 | 0.17 | 3.17  | 2.82  | -52.99  |
| 302 |    | undec-10-en-1-ol                                                                           | C11H22O     | 170.167 | -15.75 | 4.1   | 17.17 | 215.65 | 34 | 10 | -2.97 | -5.92 | -20.92 | 6.29 | 9.55  | 5.29  | -102.31 |
| 303 |    | 7-methyl-7-azabicyclo[4.3.0]nona-1(6),2,4,8-tetraene                                       | C9H9N       | 131.073 | -15.73 | 2.13  | 2.9   | 135.49 | 19 | 0  | 0     | -4.03 | -12.68 | 0.03 | 0     | -0.54 | -43.99  |
| 304 |    | (S)-2,6-dimethyloctan-2-ol                                                                 | C10H22O     | 158.167 | -15.73 | 3.93  | 16.7  | 200.24 | 33 | 6  | -2.67 | -4.6  | -10.45 | 0.02 | 2.96  | -1.91 | -27.46  |
| 305 |    | hex-3-enoic acid                                                                           | C6H10O2     | 114.068 | -15.72 | 1.42  | 28.89 | 131.75 | 17 | 3  | -5.56 | -2.76 | -3.2   | 0.7  | 5.25  | -3.57 | -19.06  |
| 306 |    | (Z)-non-6-en-1-ol                                                                          | C9H18O      | 142.136 | -15.71 | 3.05  | 17.17 | 182.26 | 28 | 7  | -3.4  | -4.79 | -18.54 | 0.43 | 9.52  | 4.99  | -95.82  |
| 307 |  | (Z)-hex-2-en-1-ol                                                                          | C6H12O      | 100.089 | -15.71 | 1.78  | 17.17 | 127.36 | 19 | 4  | -2.73 | -3.45 | -11.63 | 0    | 3.28  | 0.42  | -25.16  |
| 308 |  | 9,10-Dimethoxy-5,6-dihydro[1,3]dioxolo[4,5-g]isoquinolino[3,2-a]isoquinolin-7-ium chloride | C20H18ClNO4 | 371.814 | -15.64 | 5.38  | 33.45 | 340.03 | 43 | 0  | 0     | -5.97 | -15.45 | 0    | 2.64  | 2.78  | -115.84 |
| 309 |  | 7-hydroxy-3,7-dimethyloctanal                                                              | C10H20O2    | 172.146 | -15.63 | 2.63  | 30.8  | 207.15 | 32 | 7  | -5.23 | -4.38 | -13.86 | 3.46 | 10.08 | 4     | -92.45  |
| 310 |  | allyl butanoate                                                                            | C7H12O2     | 128.084 | -15.63 | 1.97  | 20.96 | 153.14 | 21 | 4  | -3.08 | -4.37 | -18.23 | 0    | 8.75  | 6.58  | -87.73  |
| 311 |  | methyl non-2-ynoate                                                                        | C10H16O2    | 168.115 | -15.63 | 2.97  | 21.09 | 209.95 | 28 | 5  | -2.15 | -5.38 | -20.95 | 2.18 | 8.62  | 7.43  | -59.32  |
| 312 |  | heptyl ethanoate                                                                           | C9H18O2     | 158.131 | -15.6  | 3.13  | 21.66 | 186.24 | 29 | 6  | -2.94 | -5.16 | -19.12 | 2.25 | 8.96  | 6.21  | -95.79  |
| 313 |  | 3-amino-propanoic acid                                                                     | C3H7NO2     | 90.056  | -15.59 | -1.37 | 50.05 | 83.19  | 14 | 4  | -7.14 | -1.5  | -10.6  | 0    | 12.25 | 3.77  | -43.49  |
| 314 |  | nonan-3-one                                                                                | C9H18O      | 142.136 | -15.58 | 3.27  | 13.27 | 177.87 | 28 | 6  | -2.91 | -5.02 | -16.38 | 1.67 | 7.1   | 3.92  | -85.06  |

|     |                                                                                     |                                                                            |          |         |        |       |       |        |    |   |       |       |        |      |       |       |         |
|-----|-------------------------------------------------------------------------------------|----------------------------------------------------------------------------|----------|---------|--------|-------|-------|--------|----|---|-------|-------|--------|------|-------|-------|---------|
| 315 | 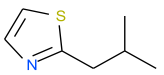   | 2-isobutyl-thiazole                                                        | C7H11NS  | 141.061 | -15.58 | 2.31  | 11.17 | 135.59 | 20 | 2 | 0     | -4.32 | -12.56 | 0.52 | 0.49  | -2.55 | -35.48  |
| 316 |    | m-xylene                                                                   | C8H10    | 106.078 | -15.51 | 2.66  | 0     | 117.85 | 18 | 0 | 0     | -3.84 | -12.07 | 0.05 | 0     | -1.32 | -40.32  |
| 317 |    | 4-propyl-phenol                                                            | C9H12O   | 136.089 | -15.5  | 2.98  | 17.86 | 143.06 | 22 | 2 | -3.08 | -4.23 | -16.83 | 0.94 | 8.66  | 6.46  | -81.42  |
| 318 |    | 5-isopropenyl-2-methyl-cyclohexanone                                       | C10H16O  | 152.12  | -15.5  | 2.58  | 13.68 | 188.23 | 27 | 1 | -4.11 | -4.7  | -10.09 | 0.71 | 7.44  | 2.98  | -70.01  |
| 319 |    | (3-phenyl-allyloxy)-methanone                                              | C10H10O2 | 162.068 | -15.49 | 2.38  | 22.48 | 171.61 | 22 | 3 | -2.57 | -4.08 | -18.73 | 0    | 8.86  | 6.11  | -80.41  |
| 320 |    | 5-methyl-7-aza-bicyclo[4.3.0]nona-1(6),2,4,8-tetraene                      | C9H9N    | 131.073 | -15.49 | 2.48  | 10.79 | 132.9  | 19 | 0 | -2.27 | -3.85 | -11.17 | 0.13 | 3.34  | 2.25  | -75.44  |
| 321 |    | thiophene-2-thiol                                                          | C4H4S2   | 115.975 | -15.47 | 2.05  | 0     | 86.55  | 10 | 1 | -2.08 | -3.51 | -12.63 | 0    | 3.67  | 2.18  | -43.05  |
| 322 |   | 3a,6,6,9a-tetramethyl-2,4,5,5a,7,8,9,9b-octahydro-1H-benzo[e][1]benzofuran | C16H28O  | 236.393 | -15.44 | 4.88  | 8.19  | 308.69 | 45 | 0 | 0     | -5.58 | -11.07 | 0.41 | 0.46  | -1.47 | -69.97  |
| 323 |  | N1-(3-amino-propyl)-butane-1,4-diamine                                     | C7H19N3  | 145.158 | -15.44 | -1.38 | 54.54 | 165.62 | 29 | 9 | -6.25 | -3.97 | -17.87 | 1.63 | 17.55 | 3.55  | -69.32  |
| 324 |  | 2-phenyl-ethyl 2-phenyl-ethanoate                                          | C16H16O2 | 240.115 | -15.43 | 3.68  | 20.42 | 239.78 | 34 | 5 | -3.07 | -6.27 | -18.79 | 2.99 | 8.42  | 9.13  | -127.33 |
| 325 |  | 1-methyl-2-nitro-benzene                                                   | C7H7NO2  | 137.048 | -15.43 | 1.87  | 38.2  | 122.16 | 17 | 1 | 0     | -3.23 | -11.52 | 0    | 0     | -3.56 | -22.29  |
| 326 |  | 2-methyl-4-methylsulfanyl-but-1-ene                                        | C6H12S   | 116.066 | -15.42 | 2.43  | 0     | 138.56 | 19 | 3 | 0     | -4.27 | -12.96 | 0    | 0     | -2.11 | -34.5   |
| 327 |  | 4-hydroxy-benzaldehyde                                                     | C7H6O2   | 122.037 | -15.41 | 1.39  | 32.01 | 114.63 | 15 | 0 | -1.89 | -2.42 | -11.64 | 0.63 | 3.51  | 0     | -35.66  |
| 328 |  | (S)-2-ethyl-hexan-1-ol                                                     | C8H18O   | 130.136 | -15.38 | 3.07  | 17.63 | 155.72 | 27 | 6 | -3.08 | -4.08 | -11.91 | 2.9  | 3.2   | 1.61  | -57.86  |
| 329 |  | propyl ethanoate                                                           | C5H10O2  | 102.068 | -15.38 | 1.2   | 21.66 | 114.61 | 17 | 2 | -6.62 | -3.07 | -12.29 | 3.22 | 4.56  | 16.83 | -4.67   |

|     |                                                                                     |                                     |            |         |        |      |       |        |    |   |       |       |        |      |      |       |        |
|-----|-------------------------------------------------------------------------------------|-------------------------------------|------------|---------|--------|------|-------|--------|----|---|-------|-------|--------|------|------|-------|--------|
| 330 | 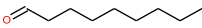   | nonanal                             | C9H18O     | 142.136 | -15.34 | 3.39 | 14.61 | 176.36 | 28 | 7 | -3.34 | -4.64 | -17.07 | 2.01 | 7.08 | 5.71  | -87.3  |
| 331 |    | heptan-2-ol                         | C7H16O     | 116.12  | -15.33 | 2.55 | 16.99 | 137.66 | 24 | 5 | -4.31 | -4.42 | -14.26 | 3.28 | 8.43 | 5.27  | -87.8  |
| 332 |    | 6-methyl-hept-5-en-2-one            | C8H14O     | 126.104 | -15.33 | 2.34 | 13.84 | 166.82 | 23 | 3 | -2.92 | -4.64 | -16.55 | 0    | 7.81 | 6.14  | -81.53 |
| 333 |    | 4-ethyl-phenol                      | C8H10O     | 122.073 | -15.29 | 2.5  | 17.86 | 125.52 | 19 | 1 | -2.97 | -3.69 | -14.79 | 0.42 | 8.02 | 4.34  | -67.26 |
| 334 |    | pentane-1-thiol                     | C5H12S     | 104.066 | -15.28 | 2.76 | 0     | 111.47 | 18 | 4 | -2.59 | -3.17 | -9.26  | 1.44 | 1.64 | -1.46 | -27.54 |
| 335 |    | pentyl pentanoate                   | C10H20O2   | 172.146 | -15.25 | 3.63 | 20.96 | 203.18 | 32 | 7 | -2.53 | -5.25 | -21.84 | 3.22 | 9.09 | 8.3   | -118.7 |
| 336 |    | 3,7-dimethyl-oct-6-enal             | C10H18O    | 154.136 | -15.25 | 3.37 | 14.61 | 198.02 | 29 | 5 | -2.32 | -4.79 | -18.57 | 0    | 7.9  | 5.27  | -97.48 |
| 337 |   | 2-isopropyl-5-methyl-phenol         | C10H14O    | 150.104 | -15.25 | 3    | 16.79 | 162.81 | 25 | 1 | -1.03 | -4.45 | -12.43 | 0    | 2.99 | -0.13 | -39.55 |
| 338 |  | 10-bromo-decanoic acid              | C10H19BrO2 | 250.057 | -15.21 | 4.09 | 28.89 | 217.63 | 31 | 9 | -3.17 | -5.48 | -19.41 | 5.05 | 9.54 | 5.05  | -99.09 |
| 339 |  | 8-bromo-octanoic acid               | C8H15BrO2  | 222.026 | -15.19 | 3.12 | 28.89 | 181.81 | 25 | 7 | -1.89 | -3.71 | -13.49 | 0.67 | 1.99 | -0.2  | -41.45 |
| 340 |  | hexane-1-thiol                      | C6H14S     | 118.082 | -15.18 | 3.24 | 0     | 129.38 | 21 | 5 | -2.07 | -3.69 | -10.5  | 1.4  | 1.64 | -1.84 | -31.68 |
| 341 |  | heptanal                            | C7H14O     | 114.104 | -15.16 | 2.42 | 14.61 | 140.55 | 22 | 5 | -2.88 | -3.79 | -16.43 | 1.39 | 6.98 | 4.33  | -85.11 |
| 342 |  | oct-2-ene                           | C8H16      | 112.125 | -15.15 | 3.81 | 0     | 153.34 | 24 | 4 | 0     | -4.73 | -13.68 | 0    | 0    | -1.05 | -29.58 |
| 343 |  | methyl oct-2-ynoate                 | C9H14O2    | 154.099 | -15.14 | 2.49 | 21.09 | 192.05 | 25 | 4 | -2.08 | -4.86 | -18.61 | 0.5  | 6.74 | 6.86  | -48.81 |
| 344 |  | 3-methyl-2-pentyl-cyclopent-2-enone | C11H18O    | 166.136 | -15.14 | 3.34 | 14.04 | 223.77 | 30 | 4 | 0     | -4.89 | -12.39 | 0.94 | 0.46 | -3.36 | -45.1  |

|     |                                                                                     |                                                                                  |          |         |        |      |       |        |    |   |       |       |        |      |       |       |         |
|-----|-------------------------------------------------------------------------------------|----------------------------------------------------------------------------------|----------|---------|--------|------|-------|--------|----|---|-------|-------|--------|------|-------|-------|---------|
| 345 | 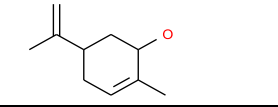   | 5-isopropenyl-2-methylcyclohex-2-enol                                            | C10H16O  | 152.12  | -15.12 | 2.81 | 16.05 | 200.94 | 27 | 2 | -2.49 | -4.08 | -11.64 | 0    | 3.11  | 3.07  | -53.84  |
| 346 |    | methyl hexanoate                                                                 | C7H14O2  | 130.099 | -15.11 | 2.18 | 21.09 | 149.87 | 23 | 4 | -2.73 | -4.47 | -17.05 | 0.05 | 7.7   | 5.57  | -83.56  |
| 347 |    | pentyl ethanoate                                                                 | C7H14O2  | 130.099 | -15.08 | 2.17 | 21.66 | 150.43 | 23 | 4 | -4.06 | -4.11 | -6.6   | 2.28 | 4.25  | -1.57 | -2.82   |
| 348 |    | (S)-7-hydroxy-3,7-dimethyl-octanal                                               | C10H20O2 | 172.146 | -15.03 | 2.63 | 30.8  | 207.15 | 32 | 7 | -4.87 | -4.46 | -14.6  | 4.11 | 10.46 | 4.31  | -104.51 |
| 349 |    | 4-methyl-benzaldehyde                                                            | C8H8O    | 120.058 | -14.99 | 2.05 | 14.4  | 125.02 | 17 | 0 | 0     | -2.77 | -14.74 | 0    | 1.76  | 0.42  | -36.08  |
| 350 |    | 2-isopropyl-5-methylcyclohexanone                                                | C10H18O  | 154.136 | -14.95 | 2.74 | 13.68 | 182.71 | 29 | 1 | -3.19 | -4.84 | -13.28 | 0.44 | 7.87  | 4.77  | -104.13 |
| 351 |   | (2-phenyl-ethoxy)methane                                                         | C9H10O2  | 150.068 | -14.95 | 1.85 | 22.48 | 147.48 | 21 | 3 | 0     | -3.76 | -15.09 | 0.79 | 0.82  | 0.38  | -45.9   |
| 352 |  | dimethylphosphane                                                                | C2H7P    | 62.0507 | -14.93 | 0.71 | 0     | 49.28  | 10 | 0 | -2.94 | -2.36 | -8.44  | 0.01 | 1.68  | 1.94  | -17.89  |
| 353 |  | (8S,9R,10S,13R,14S)-hexadecahydro-1H-cyclopenta[a]phenanthrene-2-carboxylic acid | C18H28O2 | 276.414 | -14.9  | 4.2  | 28.97 | 297.82 | 47 | 1 | 0     | -5.73 | -11.37 | 0    | 1.31  | -1.93 | -69.85  |
| 354 |  | nonan-3-ol                                                                       | C9H20O   | 144.151 | -14.87 | 3.6  | 17.13 | 173.31 | 30 | 7 | -2.02 | -4.89 | -12.51 | 3.39 | 2.98  | -0.61 | -36.33  |
| 355 |  | p-xylene                                                                         | C8H10    | 106.078 | -14.86 | 2.66 | 0     | 117.78 | 18 | 0 | 0     | -3.77 | -11.46 | 0.01 | 0     | -1.33 | -31.86  |
| 356 |  | ethyl octanoate                                                                  | C10H20O2 | 172.146 | -14.82 | 3.63 | 20.67 | 202.69 | 32 | 7 | -2.84 | -5.65 | -17.49 | 3.43 | 8.57  | 4.58  | -95.93  |
| 357 |  | heptan-1-ol                                                                      | C7H16O   | 116.12  | -14.81 | 2.56 | 17.17 | 140.18 | 24 | 6 | -2.07 | -4.06 | -12.2  | 2.2  | 3.26  | -1.08 | -22.45  |
| 358 |  | 4-isopropenyl-1-methylcyclohex-1-ene                                             | C10H16   | 136.125 | -14.76 | 3.83 | 0     | 195.06 | 26 | 1 | 0     | -4.06 | -13.75 | 0.36 | 0.64  | 0.94  | -25.18  |
| 359 |  | 8-oxo-7-oxa-bicyclo[4.3.0]nona-1(6),2,4-triene                                   | C8H6O2   | 134.037 | -14.73 | 1.6  | 21.01 | 131.46 | 16 | 0 | 0     | -3.2  | -12.12 | 0    | 1.39  | -2.29 | -43.14  |



|     |  |                                                                             |           |         |        |      |       |        |    |   |       |       |        |      |       |       |        |
|-----|--|-----------------------------------------------------------------------------|-----------|---------|--------|------|-------|--------|----|---|-------|-------|--------|------|-------|-------|--------|
| 360 |  | 2,3,5,6-tetramethylpyrazine                                                 | C8H12N2   | 136.1   | -14.69 | 1.05 | 19.78 | 149.71 | 22 | 0 | 0     | -4.32 | -12.26 | 0    | 2.06  | -1.64 | -27.31 |
| 361 |  | o-xylene                                                                    | C8H10     | 106.078 | -14.68 | 2.54 | 0     | 116.1  | 18 | 0 | 0     | -3.73 | -11.63 | 0    | 0     | -0.83 | -40.23 |
| 362 |  | hexan-2-one                                                                 | C6H12O    | 100.089 | -14.66 | 1.81 | 13.84 | 122.94 | 19 | 3 | -2.87 | -3.69 | -11.89 | 0    | 4.96  | 2.19  | -51.1  |
| 363 |  | 9-methyl-7-azabicyclo[4.3.0]nona-1(6),2,4,8-tetraene                        | C9H9N     | 131.073 | -14.62 | 2.48 | 10.11 | 135.36 | 19 | 0 | 0     | -3.88 | -12.57 | 0.13 | 0.04  | 0.79  | -47.53 |
| 364 |  | anisole                                                                     | C7H8O     | 108.058 | -14.55 | 1.95 | 7.78  | 107.74 | 16 | 1 | -2.07 | -3.65 | -12.7  | 0    | 4.56  | 2.75  | -70.23 |
| 365 |  | (1R,2R,4S)-2-ethyl-1,3,3-trimethylbicyclo[2.2.1]heptan-2-ol                 | C12H22O   | 182.167 | -14.55 | 3.79 | 16.44 | 245.86 | 35 | 2 | -1.82 | -4.8  | -9.41  | 0.18 | 2.44  | -0.53 | -37.63 |
| 366 |  | pyridine                                                                    | C5H5N     | 79.042  | -14.52 | 0.81 | 9.67  | 71.19  | 11 | 0 | -2.85 | -2.73 | -8.82  | 0    | 3.54  | 1.06  | -39.75 |
| 367 |  | decanedioic acid                                                            | C10H18O4  | 202.121 | -14.47 | 2.36 | 57.28 | 211.06 | 30 | 9 | -7.22 | -4.18 | -7.97  | 4.43 | 13.79 | -1.78 | -62.4  |
| 368 |  | 1-(propyldisulfanyl)propane                                                 | C6H14S2   | 150.305 | -14.42 | 3.33 | 0     | 151.15 | 22 | 5 | 0     | -4.95 | -12.67 | 0.25 | 0     | -2.17 | -35.07 |
| 369 |  | 2-(4-(carboxymethyl)phenyl)-acetic acid                                     | C10H10O4  | 194.058 | -14.34 | 0.95 | 57.01 | 178.76 | 22 | 4 | 0     | -3.95 | -12.5  | 0.68 | 2.77  | -5.57 | -35.92 |
| 370 |  | 3-(4-hydroxy-3-methoxyphenyl)-acrylic acid                                  | C10H10O4  | 195.066 | -14.31 | 2.04 | 52.8  | 194.87 | 25 | 1 | -3.29 | -3.72 | -17.59 | 1.61 | 6.94  | 12.57 | -32.56 |
| 371 |  | 1-methyl-4-nitrobenzene                                                     | C7H7NO2   | 137.048 | -14.31 | 1.99 | 38.5  | 122.47 | 17 | 1 | 0     | -3.4  | -11.75 | 0    | 0     | -1.34 | -30.34 |
| 372 |  | 2-methyl-pent-2-enal                                                        | C6H10O    | 98.073  | -14.28 | 1.73 | 14.67 | 127.14 | 17 | 1 | 0     | -2.93 | -14.65 | 0    | 1.76  | 0.61  | -27.02 |
| 373 |  | non-2-enoic acid                                                            | C9H16O2   | 156.115 | -14.24 | 3.42 | 28.89 | 187.56 | 26 | 6 | -1.93 | -4.09 | -10.98 | 0.78 | 3.9   | -3.27 | -53.15 |
| 374 |  | 3,3-bis(4-hydroxy-2,5-dimethylphenyl)-3H-benzo[c][1,2]oxathiole 1,1-dioxide | C23H22O5S | 410.483 | -14.22 | 5.39 | 67.78 | 393.46 | 51 | 2 | 0     | -6.42 | -13.47 | 0    | 2.34  | 0.9   | -79.85 |

|     |  |                                                                                   |          |         |        |      |       |        |    |    |       |       |        |      |      |       |        |
|-----|--|-----------------------------------------------------------------------------------|----------|---------|--------|------|-------|--------|----|----|-------|-------|--------|------|------|-------|--------|
| 375 |  | 2-phenoxy-acetic acid                                                             | C8H8O3   | 153.055 | -14.2  | 1.2  | 36.12 | 138.34 | 20 | 4  | -3.13 | -3.05 | -15.14 | 2.23 | 5.46 | 6.68  | -48.29 |
| 376 |  | 1,2-dimethoxy-4-(prop-1-enyl)-benzene                                             | C11H14O2 | 178.099 | -14.18 | 3.26 | 15.5  | 198.56 | 27 | 0  | 0     | -4.72 | -12.92 | 0    | 1.39 | 1.31  | -71.4  |
| 377 |  | cinnamic acid                                                                     | C9H8O2   | 149.06  | -14.17 | 2.33 | 28.62 | 151.6  | 20 | 2  | -2.29 | -3.67 | -14.58 | 0.82 | 4.89 | 5.75  | -25.44 |
| 378 |  | methyl ethanoate                                                                  | C3H6O2   | 74.037  | -14.15 | 0.24 | 21.79 | 79.2   | 11 | 0  | -6.28 | -2.29 | -11.08 | 0    | 4.86 | 16.24 | -14.97 |
| 379 |  | (R)-2-oxo-5-pentyl-tetrahydro-furan                                               | C9H16O2  | 156.115 | -14.12 | 2.27 | 21.43 | 177.62 | 27 | 4  | 0     | -4.8  | -13.4  | 1.95 | 1.48 | -1.54 | -43.57 |
| 380 |  | 4-methyl-phenyl ethanoate                                                         | C9H10O2  | 150.068 | -14.07 | 2    | 20.99 | 156.54 | 21 | 0  | -1.37 | -4.38 | -18.02 | 0    | 8.3  | 6.25  | -91.34 |
| 381 |  | 2,6,6-trimethyl-bicyclo[3.1.1]hept-2-ene                                          | C10H16   | 136.125 | -14.06 | 3.89 | 0     | 200.77 | 26 | 0  | 0     | -4.13 | -10.46 | 0.1  | 0    | -1.26 | -35.74 |
| 382 |  | 3-phenyl-propanoic acid                                                           | C9H10O2  | 150.068 | -14.06 | 1.84 | 28.62 | 145.08 | 20 | 3  | -2.05 | -3.02 | -9.85  | 0.76 | 4.14 | -2.89 | -34.92 |
| 383 |  | (R)-1-isopropyl-4-methyl-cyclohex-3-enol                                          | C10H18O  | 154.136 | -14.06 | 2.96 | 15.54 | 204.53 | 29 | 2  | 0     | -4.6  | -11.67 | 0.13 | 0.2  | -0.99 | -34.01 |
| 384 |  | toluene                                                                           | C7H8     | 92.063  | -14.05 | 2.26 | 0     | 96.84  | 15 | 0  | 0     | -3.38 | -10.76 | 0.02 | 0    | -1.57 | -33.79 |
| 385 |  | 3,4a,7,7,10a-pentamethyl-1-oxo-3-vinyldodecahydro-1H-benzo[f]chromen-5-yl acetate | C22H34O7 | 410.501 | -13.97 | 1.75 | 86.43 | 486.04 | 63 | 5  | 0     | -6.22 | -14.25 | 1.48 | 1.72 | 0.24  | -77.42 |
| 386 |  | butyl ethanoate                                                                   | C6H12O2  | 116.084 | -13.96 | 1.68 | 21.66 | 132.52 | 20 | 3  | -6.52 | -3.41 | -10.22 | 3.64 | 4.52 | 14.92 | -0.53  |
| 387 |  | (3R,3aR,6R,7S,8aR)-3,6,8,8-tetramethyloctahydro-1H-3a,7-methanoazulen-6-ol        | C15H26O  | 222.366 | -13.93 | 4.19 | 16.33 | 290.46 | 42 | 1  | -1.28 | -4.95 | -9.35  | 0.07 | 2.65 | -0.96 | -41.14 |
| 388 |  | (9Z,12Z)-octadeca-9,12-dienoic acid                                               | C18H32O2 | 281.248 | -13.88 | 6.73 | 28.89 | 353.96 | 53 | 15 | -2.26 | -5.66 | -21.71 | 4.03 | 6.01 | 5.8   | -51.44 |
| 389 |  | 7,9-dioxabicyclo[4.3.0]nona-1,3,5-triene-3-carbaldehyde                           | C8H6O3   | 150.032 | -13.85 | 1.8  | 31.51 | 143.91 | 17 | 0  | 0     | -2.68 | -14.6  | 0.07 | 3.06 | 0.36  | -38.31 |

|     |                                                                                     |                                                                                        |          |         |        |      |       |        |    |    |       |       |        |      |      |       |         |
|-----|-------------------------------------------------------------------------------------|----------------------------------------------------------------------------------------|----------|---------|--------|------|-------|--------|----|----|-------|-------|--------|------|------|-------|---------|
| 390 | 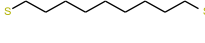   | nonane-1,9-dithiol                                                                     | C9H20S2  | 192.101 | -13.83 | 4.69 | 0     | 198.18 | 31 | 10 | -2.35 | -4.5  | -21.93 | 7.66 | 9.43 | 6.04  | -98.24  |
| 391 |    | nonan-1-ol                                                                             | C9H20O   | 144.151 | -13.83 | 3.52 | 17.17 | 175.99 | 30 | 8  | -3.74 | -5.11 | -16.57 | 4.67 | 8.77 | 6.44  | -86.15  |
| 392 |    | (E)-5-((1R,3R,6S)-2,3-dimethyltricyclo[2.2.1.0 2,6]heptan-3-yl)-2-methylpent-2-en-1-ol | C15H24O  | 220.35  | -13.82 | 4.6  | 18.45 | 302.43 | 40 | 5  | -2.61 | -4.84 | -11.26 | 0    | 3.29 | 2.75  | -57.2   |
| 393 |    | 2-phenyl-ethyl 2-methyl-propanoate                                                     | C12H16O2 | 192.115 | -13.8  | 2.88 | 21.29 | 200.63 | 30 | 4  | -2.38 | -5.29 | -16.82 | 1.8  | 8.11 | 6.22  | -98.92  |
| 394 |    | 2,3-dimethyl-butane-2,3-diol                                                           | C6H14O2  | 118.099 | -13.76 | 1.03 | 31.95 | 150.4  | 22 | 3  | -2.57 | -3.23 | -9.02  | 0.3  | 4.46 | -1.83 | -24.68  |
| 395 |    | hexane-3,4-dione                                                                       | C6H10O2  | 114.068 | -13.76 | 0.55 | 27    | 130.25 | 18 | 3  | -7.05 | -2.84 | -10.62 | 0.52 | 5.13 | 16.62 | -9.85   |
| 396 |    | ethyl benzoate                                                                         | C9H10O2  | 150.068 | -13.74 | 2.39 | 20.99 | 149.49 | 21 | 2  | 0     | -4.25 | -13.83 | 0.5  | 0.66 | 1.87  | -64.68  |
| 397 |   | (S)-3,7-dimethyl-octan-3-ol                                                            | C10H22O  | 158.167 | -13.74 | 3.87 | 16.84 | 200.41 | 33 | 6  | -1.12 | -5.14 | -12.67 | 1.77 | 2.9  | -0.83 | -29.31  |
| 398 |  | oleic acid                                                                             | C18H34O2 | 283.264 | -13.7  | 7.15 | 28.89 | 348.59 | 55 | 16 | -2.59 | -6.27 | -21.2  | 6.44 | 4.78 | 7.66  | -125.83 |
| 399 |  | (phenyl-methoxy)-methanone                                                             | C8H8O2   | 136.052 | -13.68 | 1.54 | 22.57 | 129.6  | 18 | 2  | 0     | -3.18 | -13.67 | 1    | 2.63 | -1.59 | -44.47  |
| 400 |  | 1-isopropyl-4-methyl-cyclohex-3-enol                                                   | C10H18O  | 154.136 | -13.66 | 2.96 | 15.54 | 204.53 | 29 | 2  | -3.3  | -4.96 | -13.57 | 2.92 | 8.73 | 5.83  | -90.16  |
| 401 |  | 1,3,5-trichloro-2-methoxy-benzene                                                      | C7H5Cl3O | 209.941 | -13.54 | 3.85 | 7.96  | 156.49 | 16 | 0  | 0     | -3.86 | -12.64 | 0    | 1.4  | 0.96  | -28.16  |
| 402 |  | ethyl 2-(2-methyl-1,3-dioxolan-2-yl)-ethanoate                                         | C8H14O4  | 174.089 | -13.5  | 0.78 | 36.53 | 187.9  | 26 | 3  | 0     | -4.56 | -13.32 | 0.71 | 2.58 | -1.3  | -36.76  |
| 403 |  | 2-methyl-but-2-enal                                                                    | C5H8O    | 84.058  | -13.47 | 1.33 | 14.67 | 109.37 | 14 | 0  | 0     | -2.89 | -10.6  | 0    | 0.32 | -1.78 | -21.17  |
| 404 |  | cyclopentadecanone                                                                     | C15H28O  | 224.214 | -13.46 | 4.46 | 14.11 | 277.17 | 44 | 0  | 0     | -5.45 | -9.5   | 0    | 0.79 | -1.36 | -64.86  |

|     |                                                                                     |                                                 |           |         |        |       |       |        |    |    |       |       |        |      |       |       |        |
|-----|-------------------------------------------------------------------------------------|-------------------------------------------------|-----------|---------|--------|-------|-------|--------|----|----|-------|-------|--------|------|-------|-------|--------|
| 405 | 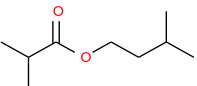   | 3-methyl-butyl 2-methylpropanoate               | C9H18O2   | 158.131 | -13.41 | 2.72  | 21.56 | 179.73 | 29 | 4  | -2.86 | -5.24 | -14.97 | 2.79 | 8.6   | 5.24  | -98.04 |
| 406 |    | pentan-2-one                                    | C5H10O    | 86.073  | -13.37 | 1.32  | 13.84 | 105.03 | 16 | 2  | -1.95 | -3.22 | -11.76 | 0    | 3.73  | 2.26  | -62.85 |
| 407 |    | 5-isopropenyl-2-methylcyclohex-2-enyl ethanoate | C12H18O2  | 194.131 | -13.32 | 3.23  | 20.64 | 245.9  | 32 | 2  | 0     | -5.09 | -13.44 | 0    | 1.36  | 1.98  | -66.94 |
| 408 |    | octanoic acid                                   | C8H16O2   | 144.115 | -13.3  | 2.8   | 28.89 | 162.68 | 25 | 6  | 0     | -4.06 | -9.8   | 1.8  | 0.46  | -7.17 | -34.41 |
| 409 |    | undeca-2,4-dienal                               | C11H18O   | 166.136 | -13.28 | 4.02  | 14.61 | 221.39 | 30 | 5  | -2.67 | -5.28 | -15.85 | 4.06 | 8.03  | 5.83  | -92.64 |
| 410 |    | 2-hydroxybenzoic acid                           | C7H6O3    | 139.04  | -13.27 | 1.18  | 45.19 | 120.18 | 17 | 1  | -3.56 | -2.25 | -13.18 | 0.33 | 6.35  | 7.66  | -34.13 |
| 411 |    | (R)-1-phenylethyl butanoate                     | C12H16O2  | 192.115 | -13.19 | 3.09  | 20.06 | 203.28 | 30 | 4  | 0     | -4.64 | -16.26 | 1.57 | 1.5   | 4.02  | -70.97 |
| 412 |   | 2-(2-(carboxymethyl)phenyl)acetic acid          | C10H10O4  | 194.058 | -13.18 | 0.83  | 57.01 | 178.62 | 22 | 4  | 0     | -3.66 | -12.94 | 0.72 | 3.04  | -3.74 | -31.16 |
| 413 |  | (2S,3S)-2-amino-3-methylpentanoic acid          | C6H13NO2  | 132.102 | -13.12 | -0.45 | 49.89 | 132.97 | 23 | 5  | -6.95 | -2.74 | -11.66 | 0    | 12.95 | 7.98  | -64.46 |
| 414 |  | (2S,3R,4S,5S)-hexane-1,2,3,4,5,6-hexaol         | C6H14O6   | 182.079 | -13.12 | -3.6  | 98.41 | 151.83 | 26 | 11 | -6.1  | -2.44 | -12.23 | 2.6  | 8.85  | 4.46  | -26.88 |
| 415 |  | 1-methyl-ethyl 3-methylbut-2-enoate             | C8H14O2   | 142.099 | -13.08 | 2.62  | 20.35 | 173.29 | 24 | 1  | -2.6  | -4.93 | -13.54 | 0    | 8.64  | 4.95  | -90.18 |
| 416 |  | 2-((1-methyl-ethylsulfanyl)-methyl)furan        | C8H12OS   | 156.061 | -13.08 | 2.41  | 7.99  | 148.25 | 22 | 3  | -2.26 | -4.86 | -15.43 | 0    | 7.25  | 6.17  | -87.53 |
| 417 |  | (R)-2-amino-4-methylsulfanylbutanoic acid       | C5H11NO2S | 150.059 | -13.07 | -1.27 | 49.71 | 135.27 | 21 | 6  | -7.53 | -3.24 | -17.88 | 2.89 | 16.7  | 15    | -69.21 |
| 418 |  | decan-2-one                                     | C10H20O   | 156.151 | -13.07 | 3.73  | 13.84 | 194.56 | 31 | 7  | 0     | -5.55 | -13.26 | 2.84 | 0.46  | -0.96 | -43.2  |
| 419 |  | nonyl ethanoate                                 | C11H22O2  | 186.162 | -13.06 | 4.09  | 21.66 | 222.05 | 35 | 8  | -3.75 | -6.02 | -15.72 | 4.14 | 9.19  | 6.8   | -73.66 |

|     |                                                                                     |                                                        |           |         |        |       |       |        |    |   |       |       |        |      |       |       |        |
|-----|-------------------------------------------------------------------------------------|--------------------------------------------------------|-----------|---------|--------|-------|-------|--------|----|---|-------|-------|--------|------|-------|-------|--------|
| 420 | 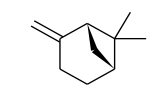   | (1R,5R)-6,6-dimethyl-2-methylene-bicyclo[3.1.1]heptane | C10H16    | 136.125 | -13.06 | 3.72  | 0     | 194.46 | 26 | 0 | 0     | -3.73 | -11.15 | 0    | 0     | 0.9   | -29.53 |
| 421 |    | octan-3-ol                                             | C8H18O    | 130.136 | -13.05 | 3.12  | 17.13 | 155.4  | 27 | 6 | -2.16 | -4    | -9.93  | 2.23 | 2.99  | -1.23 | -27.83 |
| 422 |    | (Z)-hex-3-enal                                         | C6H10O    | 98.073  | -13.03 | 1.52  | 14.61 | 127.43 | 17 | 3 | 0     | -3.09 | -11.81 | 0.32 | 0.37  | -1.85 | -22.58 |
| 423 |    | 3-methylsulfanylpropan-1-ol                            | C4H10OS   | 106.045 | -12.93 | 0.63  | 17.17 | 104.89 | 16 | 4 | -3.57 | -3.31 | -12.4  | 0    | 7.15  | 4.51  | -59.77 |
| 424 |    | 4-isopropyl-1-methyl-7-oxabicyclo[2.2.1]heptane        | C10H18O   | 154.136 | -12.93 | 3.06  | 6.18  | 205.07 | 29 | 1 | 0     | -4.51 | -10.78 | 0.2  | 0.71  | -0.39 | -44.34 |
| 425 |    | (R)-2-amino-3-(4-hydroxyphenyl)propanoic acid          | C9H11NO3  | 182.082 | -12.9  | -0.57 | 67.05 | 162.95 | 25 | 5 | -8.14 | -3.12 | -17.94 | 3.01 | 19.83 | 14.94 | -84.33 |
| 426 |    | octyl 2-methylpropanoate                               | C12H24O2  | 200.178 | -12.87 | 4.33  | 21.56 | 236.13 | 38 | 8 | -3.28 | -6.35 | -17.08 | 3.41 | 10.18 | 6.58  | -80.25 |
| 427 |   | acetic acid                                            | C2H4O2    | 61.029  | -12.87 | -0.11 | 29.33 | 55.57  | 9  | 1 | -5.16 | -1.41 | -7.04  | 0.03 | 6.36  | 4.22  | -26.14 |
| 428 |  | (S)-2-amino-5-((diaminomethylene)amino)pentanoic acid  | C6H14N4O2 | 174.201 | -12.86 | -2.41 | 99.14 | 159.25 | 27 | 7 | -9.5  | -2.21 | -20.9  | 4.53 | 23.89 | 17.34 | -74.16 |
| 429 |  | (1S,2S)-1,2-dimethylcyclohex-3-enecarbaldehyde         | C9H14O    | 138.104 | -12.85 | 2.12  | 14.59 | 179.66 | 24 | 1 | 0     | -3.95 | -10.09 | 0.5  | 0.31  | -1.44 | -30.63 |
| 430 |  | diamino-methanone                                      | CH4N2O    | 60.032  | -12.82 | -1.02 | 55.34 | 52.76  | 8  | 0 | -4.96 | -0.51 | -8.13  | 0.02 | 9.46  | 1.69  | -34.19 |
| 431 |  | 2,4-dimethylthiazole                                   | C5H7NS    | 113.03  | -12.8  | 1.39  | 9.86  | 104.79 | 14 | 0 | 0     | -3.48 | -11.89 | 0.04 | 1.51  | 0.43  | -31.82 |
| 432 |  | allyl-benzene                                          | C9H10     | 118.078 | -12.79 | 2.9   | 0     | 138    | 19 | 2 | 0     | -4.55 | -17.76 | 0.37 | 5.19  | 4.43  | -78.54 |
| 433 |  | heptan-3-ol                                            | C7H16O    | 116.12  | -12.79 | 2.64  | 17.13 | 137.5  | 24 | 5 | -2.6  | -3.74 | -7.87  | 0.33 | 2.98  | -1.63 | -23.44 |
| 434 |  | octan-2-ol                                             | C8H18O    | 130.136 | -12.78 | 3.03  | 16.99 | 155.57 | 27 | 6 | -3.17 | -4.82 | -14.48 | 0.72 | 8.42  | 4.61  | -76.05 |

|     |                                                                                     |                                                                            |           |         |        |       |       |        |    |   |       |       |        |      |       |       |        |
|-----|-------------------------------------------------------------------------------------|----------------------------------------------------------------------------|-----------|---------|--------|-------|-------|--------|----|---|-------|-------|--------|------|-------|-------|--------|
| 435 | 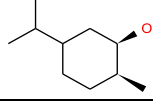   | (1R,2S)-5-isopropyl-2-methyl-cyclohexanol                                  | C10H20O   | 156.151 | -12.78 | 2.95  | 16.05 | 179.36 | 31 | 2 | 0     | -4.69 | -9.85  | 0    | 0.09  | -1.61 | -40.95 |
| 436 |    | 3,7,11-trimethyl-dodeca-2,6,10-trien-1-ol                                  | C15H26O   | 222.198 | -12.77 | 5.32  | 17.17 | 309.64 | 42 | 8 | -2.98 | -6.68 | -16.11 | 0    | 9.37  | 5.34  | -101.5 |
| 437 |    | 3-methyl-butyl ethanoate                                                   | C7H14O2   | 130.099 | -12.71 | 2     | 21.66 | 147.74 | 23 | 3 | 0     | -3.89 | -12.79 | 0.67 | 2.32  | -1.3  | -39.54 |
| 438 |    | 2,4,7-trimethyl-2,4,7,9-tetraaza-bicyclo[4.3.0]nona-1(6),8-diene-3,5-dione | C8H10N4O2 | 194.08  | -12.69 | -0.31 | 43.79 | 205.73 | 24 | 0 | -3.92 | -3.97 | -14.63 | 0.34 | 11.45 | 8.98  | -40.88 |
| 439 |    | ethyl butanoate                                                            | C6H12O2   | 116.084 | -12.68 | 1.7   | 20.67 | 131.06 | 20 | 3 | 0     | -4    | -11.14 | 0.97 | 1.36  | -2.55 | -25.83 |
| 440 |    | cyclohex-3-enecarbaldehyde                                                 | C7H10O    | 110.073 | -12.64 | 1.67  | 14.59 | 140.18 | 18 | 1 | 0     | -3.26 | -11.12 | 0    | 0.74  | -0.76 | -28.55 |
| 441 |    | 4-methoxy-benzoic acid                                                     | C8H8O3    | 153.055 | -12.63 | 1.65  | 36.19 | 140.84 | 20 | 1 | 0     | -3.4  | -14.96 | 1.14 | 4.27  | 1.22  | -33.77 |
| 442 |   | 2-amino-acetic acid                                                        | C2H5NO2   | 76.04   | -12.61 | -1.84 | 50.55 | 64.82  | 11 | 3 | -6.16 | -1.09 | -9.53  | 0.11 | 10.95 | 4.9   | -23    |
| 443 |  | 1,3,3-trimethyl-2-oxa-bicyclo[2.2.2]octane                                 | C10H18O   | 154.136 | -12.6  | 2.93  | 6.37  | 202.66 | 29 | 0 | 0     | -4.35 | -9.73  | 0.01 | 1.05  | -1.12 | -31.03 |
| 444 |  | (1R,4R,5S)-1-isopropyl-4-methyl-bicyclo[3.1.0]hexan-3-one                  | C10H16O   | 152.12  | -12.56 | 2.44  | 14.3  | 195.66 | 27 | 1 | 0     | -4.66 | -8.98  | 0.03 | 0.04  | -1.64 | -39.08 |
| 445 |  | (R)-2-hexyl-5-oxo-tetrahydro-furan                                         | C10H18O2  | 170.131 | -12.52 | 2.75  | 21.43 | 195.53 | 30 | 5 | 0     | -5.18 | -12.39 | 0.89 | 0.72  | -0.29 | -27.51 |
| 446 |  | 1,1-dimethoxy-3,7-dimethyl-octa-2,6-diene                                  | C12H22O2  | 198.162 | -12.51 | 3.82  | 16    | 253.95 | 36 | 6 | -3.92 | -6.05 | -12.24 | 0    | 8.7   | 5.41  | -80.5  |
| 447 |  | 3-methyl-pentan-3-ol                                                       | C6H14O    | 102.104 | -12.51 | 2.1   | 16.84 | 131.59 | 21 | 3 | -1.97 | -3.48 | -9.55  | 1.43 | 2.97  | 0.5   | -23.15 |
| 448 |  | 1,2-dimethoxy-benzene                                                      | C8H10O2   | 138.068 | -12.47 | 1.92  | 15.5  | 139.09 | 20 | 0 | -2.26 | -4.45 | -14.45 | 8.13 | 8.5   | 6.52  | -83.58 |
| 449 |  | 4-allyl-1,2-dimethoxy-benzene                                              | C11H14O2  | 178.099 | -12.43 | 2.96  | 15.5  | 201.27 | 27 | 2 | -3.3  | -5.45 | -10.47 | 0.62 | 8.61  | 3.63  | -84.84 |

|     |                                                                                     |                                                       |         |         |        |       |       |        |    |    |       |       |        |      |      |       |        |
|-----|-------------------------------------------------------------------------------------|-------------------------------------------------------|---------|---------|--------|-------|-------|--------|----|----|-------|-------|--------|------|------|-------|--------|
| 450 | 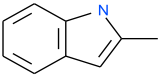   | 8-methyl-7-aza-bicyclo[4.3.0]nona-1(6),2,4,8-tetraene | C9H9N   | 131.073 | -12.42 | 2.47  | 9.39  | 137.32 | 19 | 0  | -2.24 | -3.9  | -10.58 | 0    | 4.72 | 4.4   | -74.02 |
| 451 |    | (S)-2-methyl-but-3-en-1-ol                            | C5H10O  | 86.073  | -12.4  | 1.05  | 17.63 | 103.62 | 16 | 3  | -1.77 | -3.03 | -9.76  | 0.46 | 3.15 | -0.45 | -22.34 |
| 452 |    | 2-butyl-5-oxo-tetrahydro-furan                        | C8H14O2 | 142.099 | -12.33 | 1.78  | 21.43 | 159.72 | 24 | 3  | 0     | -4.05 | -10.73 | 1.2  | 0.3  | -1.38 | -37.89 |
| 453 |    | 3-allylsulfanyl-prop-1-ene                            | C6H10S  | 114.05  | -12.27 | 2.51  | 0     | 139.74 | 17 | 4  | 0     | -4.31 | -13.14 | 0    | 0    | 2.07  | -36.42 |
| 454 |    | (R)-propane-1,2-diol                                  | C3H8O2  | 76.052  | -12.27 | -0.54 | 34.1  | 73.97  | 13 | 3  | -6.01 | -1.87 | -9.82  | 1.29 | 7.84 | 9.6   | -4.51  |
| 455 |    | 3-methyl-but-2-enal                                   | C5H8O   | 84.058  | -12.25 | 1.49  | 14.61 | 110.87 | 14 | 0  | 0     | -2.81 | -10.58 | 0    | 0.55 | -0.31 | -32.25 |
| 456 |    | 3-methylsulfanyl-prop-1-ene                           | C4H8S   | 88.035  | -12.23 | 1.65  | 0     | 98.85  | 13 | 2  | 0     | -3.76 | -13.69 | 0.16 | 2.01 | 1.93  | -37.56 |
| 457 |   | 2-oxo-oxonane                                         | C8H14O2 | 142.099 | -12.2  | 1.14  | 22.03 | 163.55 | 24 | 0  | 0     | -3.93 | -8.98  | 0    | 1.18 | -2.22 | -33.35 |
| 458 |  | (Z)-hept-4-enal                                       | C7H12O  | 112.089 | -12.14 | 1.95  | 14.61 | 146.82 | 20 | 4  | 0     | -3.56 | -11.65 | 0    | 0.35 | -1.17 | -26.52 |
| 459 |  | tridecanal                                            | C13H26O | 198.198 | -12.12 | 5.31  | 14.61 | 247.99 | 40 | 11 | -2.61 | -6.14 | -19.11 | 4.45 | 9.37 | 6.19  | -75.67 |
| 460 |  | methanephosphine                                      | CH5P    | 48.013  | -12.12 | 0.6   | 0     | 25.95  | 7  | 1  | -2.86 | -1.46 | -8.59  | 0.02 | 4.21 | 1.4   | 7.79   |
| 461 |  | hexan-1-ol                                            | C6H14O  | 102.104 | -12.09 | 2.08  | 17.17 | 122.27 | 21 | 5  | -2.44 | -3.45 | -10.05 | 1.64 | 3.18 | 1.62  | -47.92 |
| 462 |  | (S)-hexan-2-ol                                        | C6H14O  | 102.104 | -12.08 | 2.06  | 16.99 | 119.76 | 21 | 4  | -2.13 | -3.53 | -8.9   | 2.08 | 3.1  | -0.21 | -24.69 |
| 463 |  | 1,3,3-trimethyl-bicyclo[2.2.1]heptan-2-one            | C10H16O | 152.12  | -12.03 | 2.52  | 14.23 | 203.77 | 27 | 0  | 0     | -4.08 | -10.15 | 0.04 | 1.56 | -0.49 | -44.33 |
| 464 |  | (R)-heptan-3-ol                                       | C7H16O  | 116.12  | -12.02 | 2.64  | 17.13 | 137.5  | 24 | 5  | -1.37 | -4.18 | -10.64 | 1.45 | 2.8  | -0.33 | -22.31 |

|     |                                                                                     |                                                       |           |         |        |      |       |        |    |   |       |       |        |      |       |       |        |
|-----|-------------------------------------------------------------------------------------|-------------------------------------------------------|-----------|---------|--------|------|-------|--------|----|---|-------|-------|--------|------|-------|-------|--------|
| 465 | 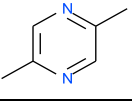   | 2,5-dimethyl-pyrazine                                 | C6H8N2    | 108.069 | -12    | 0.52 | 18.13 | 109.37 | 16 | 0 | 0     | -3.2  | -11.39 | 0    | 2.2   | -0.19 | -32.68 |
| 466 |    | oct-2-enoic acid                                      | C8H14O2   | 142.099 | -11.98 | 2.94 | 28.89 | 169.65 | 23 | 5 | 0     | -4.31 | -11.56 | 0.16 | 2.14  | -3.23 | -28.03 |
| 467 |    | 2,3-dimethyl-pyrazine                                 | C6H8N2    | 108.069 | -11.95 | 0.4  | 19.49 | 107.45 | 16 | 0 | 0     | -3.49 | -10.59 | 0    | 1.49  | -0.22 | -19.01 |
| 468 |    | 2-isopropyl-phenol                                    | C9H12O    | 136.089 | -11.85 | 2.6  | 16.79 | 141.79 | 22 | 1 | -2.69 | -4.19 | -13.43 | 0.49 | 8.45  | 6.43  | -76.54 |
| 469 |    | 6-(5-carboxy-pyridin-2-yl)-pyridine-3-carboxylic acid | C12H8N2O4 | 244.048 | -11.85 | 1.19 | 75.06 | 206.86 | 24 | 2 | 0     | -3.82 | -14.79 | 0.2  | 6.37  | -0.73 | -45.47 |
| 470 |    | 2,2-dimethylthietane 1,1-dioxide                      | C5H10O2S  | 134.197 | -11.84 | 1.02 | 29.29 | 115.14 | 18 | 1 | 0     | -2.37 | -10.73 | 0.05 | 0     | -0.19 | -22.66 |
| 471 |    | hexan-2-ol                                            | C6H14O    | 102.104 | -11.82 | 2.06 | 16.99 | 119.76 | 21 | 4 | -1.55 | -3.76 | -9.72  | 0.48 | 2.93  | -0.4  | -18.75 |
| 472 |   | 2,4-dihydroxy-benzoic acid                            | C7H6O4    | 155.034 | -11.73 | 0.93 | 62.81 | 130.8  | 18 | 1 | -7.74 | -2.18 | -15.6  | 3.29 | 17.17 | 17.32 | -83.65 |
| 473 |  | (1R,4R)-1,7,7-trimethyl-bicyclo[2.2.1]heptan-2-one    | C10H16O   | 152.12  | -11.73 | 2.61 | 14.33 | 199.91 | 27 | 0 | 0     | -4    | -8.74  | 0.06 | 0.53  | -1.09 | -35.59 |
| 474 |  | (S)-2-oxo-6-propyl-tetrahydro-2H-pyran                | C8H14O2   | 142.099 | -11.73 | 1.66 | 21.06 | 158.82 | 24 | 2 | 0     | -4.02 | -12    | 0.23 | 2.87  | -0.58 | -31.8  |
| 475 |  | heptanoic acid                                        | C7H14O2   | 130.099 | -11.71 | 2.32 | 28.89 | 144.77 | 22 | 5 | -6.43 | -3.15 | 1      | 7.5  | 5.22  | -1.89 | -5.36  |
| 476 |  | 4-methyl-pentanoic acid                               | C6H12O2   | 117.092 | -11.69 | 1.67 | 28.89 | 124.18 | 21 | 4 | -2.91 | -3.24 | -10.93 | 0.92 | 4.48  | 4.57  | -20.81 |
| 477 |  | sulfane                                               | H2S       | 34.0809 | -11.61 | 0.48 | 0     | 11.95  | 3  | 0 | -3.18 | -1.89 | -5.63  | 0    | 4.26  | 0.19  | -4.52  |
| 478 |  | methylsulfanyl-benzene                                | C7H8S     | 124.035 | -11.36 | 2.54 | 0     | 113.65 | 16 | 1 | 0     | -4.3  | -16.07 | 0.17 | 4.65  | 5.3   | -67.7  |
| 479 |  | piperidine                                            | C5H11N    | 85.089  | -11.36 | 0.75 | 12.39 | 102.29 | 17 | 0 | -1.61 | -3.05 | -7.46  | 0    | 2.66  | 0.34  | -18.17 |



|     |                                                                                     |                                                      |          |         |        |       |       |        |    |   |       |       |        |      |       |       |        |
|-----|-------------------------------------------------------------------------------------|------------------------------------------------------|----------|---------|--------|-------|-------|--------|----|---|-------|-------|--------|------|-------|-------|--------|
| 480 | 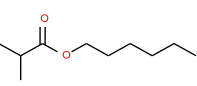   | hexyl 2-methylpropanoate                             | C10H20O2 | 172.146 | -11.3  | 3.37  | 21.56 | 200.32 | 32 | 6 | -2.73 | -5.6  | -14.06 | 2.6  | 7.9   | 5.88  | -83.24 |
| 481 |    | 9-methyl-7-azabicyclo[4.3.0]nona-1,3,5,8-tetraene    | C9H9N    | 131.073 | -11.25 | 2.48  | 10.11 | 135.36 | 19 | 0 | -1.07 | -4.11 | -15.29 | 0    | 6.73  | 6.76  | -85.68 |
| 482 |    | 2,6,6-trimethyl-cyclohex-2-ene-1,4-dione             | C9H12O2  | 152.084 | -11.22 | 0.95  | 26.93 | 203.88 | 23 | 0 | 0     | -3.53 | -12.56 | 0.06 | 2.01  | 3.33  | -59.9  |
| 483 |    | 1,7,7-trimethylbicyclo[2.2.1]heptan-2-one            | C10H16O  | 152.12  | -11.22 | 2.61  | 14.33 | 199.91 | 27 | 0 | 0     | -3.92 | -8.36  | 0    | 0.59  | -1.03 | -26.62 |
| 484 |    | 1-methylpiperidine                                   | C6H13N   | 99.105  | -11.09 | 1.37  | 3.91  | 123.02 | 20 | 0 | 0     | -3.52 | -10.8  | 0    | 0.93  | 2.08  | -40.66 |
| 485 |    | (R)-2-butyl-5-oxotetrahydrofuran                     | C8H14O2  | 142.099 | -11.06 | 1.78  | 21.43 | 159.72 | 24 | 3 | -1.77 | -3.24 | -10.52 | 1.25 | 3.62  | 2.42  | -32.2  |
| 486 |    | decan-1-ol                                           | C10H22O  | 158.167 | -11.05 | 4     | 17.17 | 193.9  | 33 | 9 | 0     | -5.65 | -13.62 | 3.12 | 1.09  | 0.22  | -41.29 |
| 487 |   | (S)-hept-1-en-3-ol                                   | C7H14O   | 114.104 | -10.94 | 2.33  | 17.13 | 139.88 | 22 | 5 | 0     | -3.89 | -11.81 | 0.83 | 2.44  | -2.04 | -21.88 |
| 488 |  | (2S,4aR,8aR)-decahydronaphthalen-2-ol                | C10H18O  | 154.136 | -10.92 | 2.4   | 16.07 | 173.04 | 29 | 1 | 0     | -4.44 | -8.53  | 0    | 0.78  | -0.9  | -45.86 |
| 489 |  | (S)-2-amino-3-mercaptopropanoic acid                 | C3H7NO2S | 122.028 | -10.9  | -1.75 | 49.71 | 96.43  | 15 | 5 | -8.33 | -1.35 | -13.91 | 0.62 | 17.16 | 13.82 | -44.86 |
| 490 |  | (R)-2-amino-3-phenylpropanoic acid                   | C9H11NO2 | 166.087 | -10.86 | -0.31 | 49.44 | 152.4  | 24 | 5 | -5.54 | -3.51 | -18.25 | 1.2  | 13.85 | 15.73 | -85.06 |
| 491 |  | 4-methyl-7-azabicyclo[4.3.0]nona-1(6),2,4,8-tetraene | C9H9N    | 131.073 | -10.86 | 2.6   | 10.02 | 133.43 | 19 | 0 | -1.23 | -4.21 | -15.14 | 0.02 | 6.79  | 7.76  | -75.15 |
| 492 |  | (R)-2-hydroxypropanoic acid                          | C3H6O3   | 91.04   | -10.85 | -0.71 | 44.93 | 79.28  | 13 | 3 | -5.9  | -1.66 | -7.37  | 0    | 9.14  | 5.91  | -38.03 |
| 493 |  | 2-oxopropanoic acid                                  | C3H4O3   | 89.024  | -10.84 | -0.49 | 42.74 | 81.86  | 11 | 2 | -4.67 | -1.46 | -10.83 | 0    | 8.59  | 7.8   | -26.96 |
| 494 |  | methanethiol                                         | CH4S     | 48.003  | -10.82 | 0.89  | 0     | 32.86  | 6  | 1 | -2.49 | -1.41 | -7.83  | 0.03 | 2.5   | 2.68  | -3.35  |

|     |  |                                                       |          |         |        |       |       |        |    |    |       |       |        |      |       |       |         |
|-----|--|-------------------------------------------------------|----------|---------|--------|-------|-------|--------|----|----|-------|-------|--------|------|-------|-------|---------|
| 495 |  | 2-cyclohexyl-acetic acid                              | C8H14O2  | 143.107 | -10.81 | 2.07  | 28.81 | 153.55 | 25 | 3  | -2.24 | -3.67 | -10.97 | 0.54 | 3.96  | 5.3   | -26.73  |
| 496 |  | 2-amino-ethanesulfonic acid                           | C2H7NO3S | 125.015 | -10.67 | -2.88 | 64.72 | 88.88  | 14 | 4  | -8.32 | -1.18 | -9.09  | 1.08 | 9.59  | 16.17 | -5.29   |
| 497 |  | 2-dimethylamino-acetic acid                           | C4H9NO2  | 104.071 | -10.6  | -0.76 | 32.78 | 106.75 | 17 | 3  | -4.86 | -2.6  | -7.02  | 0.43 | 8.19  | 3.79  | -37.99  |
| 498 |  | cyclohexanone                                         | C6H10O   | 98.073  | -10.47 | 1.24  | 13.78 | 116.59 | 17 | 0  | 0     | -3.2  | -9.18  | 0    | 0.4   | 0.83  | -40.77  |
| 499 |  | dodecanoic acid                                       | C12H24O2 | 200.178 | -10.45 | 4.73  | 28.89 | 234.3  | 37 | 10 | -1.71 | -5.91 | -16.7  | 3.66 | 9.86  | 1.75  | -79.91  |
| 500 |  | 2-ethyl-pyrazine                                      | C6H8N2   | 108.069 | -10.39 | 0.64  | 19.3  | 106.74 | 16 | 1  | -6.77 | -3.01 | -8.01  | 0.95 | 4.79  | 19.05 | 5.76    |
| 501 |  | pentan-3-one                                          | C5H10O   | 86.073  | -10.38 | 1.34  | 13.27 | 106.68 | 16 | 2  | 0     | -3.07 | -10.1  | 0.05 | 1.23  | -0.52 | -23.64  |
| 502 |  | undec-10-enoic acid                                   | C11H20O2 | 185.154 | -10.29 | 3.86  | 28.89 | 220.24 | 34 | 10 | -3.94 | -5.35 | -22.81 | 5.25 | 12.64 | 16.04 | -117.71 |
| 503 |  | tetrachloro-methane                                   | CCl4     | 151.875 | -10.26 | 2.65  | 0     | 88.64  | 5  | 0  | 0     | -3.27 | -8.31  | 0    | 0     | 0.37  | -8.63   |
| 504 |  | 2-oxo-butanoic acid                                   | C4H6O3   | 103.04  | -10.22 | 0     | 42.17 | 99.08  | 14 | 3  | -4.68 | -1.98 | -10.66 | 0    | 8.5   | 8.22  | -28.88  |
| 505 |  | (methyldisulfanyl)methane                             | C2H6S2   | 94.199  | -10.18 | 1.31  | 0     | 63.33  | 10 | 1  | 0     | -3.2  | -8.02  | 0.12 | 0     | -0.94 | -7.32   |
| 506 |  | 3-methylsulfanylbutanal                               | C5H10OS  | 118.045 | -10.15 | 0.8   | 14.61 | 115.45 | 17 | 3  | 0     | -3.29 | -11.03 | 0    | 1.21  | 0.56  | -24.55  |
| 507 |  | 1-isopropyl-4-methylcyclohexa-1,4-diene               | C10H16   | 136.125 | -10.07 | 4.57  | 0     | 191.39 | 26 | 1  | 0     | -5.08 | -13.66 | 0    | 5.07  | 3.92  | -84.49  |
| 508 |  | p-cymene                                              | C10H14   | 134.11  | -9.99  | 3.38  | 0     | 149.9  | 24 | 1  | 0     | -4.95 | -13.67 | 2.11 | 4.64  | 4.43  | -93.48  |
| 509 |  | 3-methyl-7-aza-bicyclo[4.3.0]nona-1(6),2,4,8-tetraene | C9H9N    | 131.073 | -9.99  | 2.6   | 10.02 | 133.43 | 19 | 0  | -0.79 | -4.1  | -15.36 | 0    | 6.48  | 7.97  | -86.23  |

|     |                                                                                     |                                                |          |         |       |       |       |        |    |    |       |       |        |      |       |       |        |
|-----|-------------------------------------------------------------------------------------|------------------------------------------------|----------|---------|-------|-------|-------|--------|----|----|-------|-------|--------|------|-------|-------|--------|
| 510 |    | tetrahydro-thiophene                           | C4H8S    | 88.035  | -9.91 | 1.74  | 0     | 89.52  | 13 | 0  | 0     | -3.15 | -8.79  | 0    | 0     | 1.5   | -34.39 |
| 511 |    | (S)-3-methylsulfanylbutanal                    | C5H10OS  | 118.045 | -9.86 | 0.8   | 14.61 | 115.45 | 17 | 3  | 0     | -3.43 | -10.37 | 0    | 0.64  | 0.82  | -35.38 |
| 512 |    | 2-ethylbutanal                                 | C6H12O   | 100.089 | -9.84 | 1.87  | 14.67 | 119.58 | 19 | 3  | 0     | -3.44 | -8.36  | 0.09 | 0.44  | -1.99 | -29.33 |
| 513 |    | (R)-2-amino-3-(3H-imidazol-4-yl)propanoic acid | C6H9N3O2 | 156.077 | -9.63 | -2.32 | 71.23 | 137.25 | 21 | 5  | -2.71 | -2.53 | -16.2  | 1.5  | 8.3   | 8.94  | -49.08 |
| 514 |    | (R)-pent-1-en-3-ol                             | C5H10O   | 86.073  | -9.55 | 1.36  | 17.13 | 104.12 | 16 | 3  | -5.31 | -2.94 | -11.74 | 3.24 | 4.86  | 18.4  | -4.97  |
| 515 |    | 1-methyl-2,4-dinitrobenzene                    | C7H6N2O4 | 182.033 | -9.5  | 1.59  | 76.46 | 147.87 | 19 | 2  | 0     | -2.94 | -17.34 | 0    | 5.38  | 6.93  | -74.23 |
| 516 |    | propan-1-ol                                    | C3H8O    | 60.058  | -9.5  | 0.63  | 17.17 | 68.56  | 12 | 2  | -6.16 | -2.23 | -9.53  | 1.1  | 4.84  | 18.62 | 3.35   |
| 517 |   | 2-methyl-6-tert-butylphenol                    | C11H16O  | 164.12  | -9.49 | 3.37  | 15.72 | 191.79 | 28 | 1  | -2.63 | -4.96 | -11.93 | 1.31 | 8.69  | 8.04  | -99    |
| 518 |  | dodecan-1-ol                                   | C12H26O  | 186.198 | -9.49 | 4.97  | 17.17 | 229.71 | 39 | 11 | -3.61 | -6.34 | -14.03 | 4.58 | 10.32 | 5.41  | -70.22 |
| 519 |  | 4-hydroxybenzoic acid                          | C7H6O3   | 139.04  | -9.49 | 1.3   | 46.26 | 119.55 | 17 | 1  | -2.91 | -2.27 | -14.6  | 0.43 | 7.98  | 11.22 | -38.92 |
| 520 |  | propionaldehyde                                | C3H6O    | 58.042  | -9.44 | 0.49  | 14.61 | 68.34  | 10 | 1  | -3.71 | -1.7  | -12.83 | 0.17 | 3.35  | 16.39 | -9.77  |
| 521 |  | 1-methylsulfanylpropane                        | C4H10S   | 90.05   | -9.42 | 1.79  | 0     | 96.91  | 15 | 2  | 0     | -3.77 | -11.78 | 0    | 2.12  | 3.18  | -53.07 |
| 522 |  | (R)-3-methylpentanoic acid                     | C6H12O2  | 117.092 | -9.4  | 1.77  | 28.89 | 123.04 | 21 | 4  | -4.28 | -3.1  | -14.12 | 1.34 | 10.34 | 11.3  | -75.97 |
| 523 |  | (S)-2-amino-propanoic acid                     | C3H7NO2  | 90.056  | -9.38 | -1.85 | 49.27 | 84.13  | 14 | 3  | -6.05 | -1.67 | -12.93 | 0.34 | 12.15 | 13.72 | -48.86 |
| 524 |  | 1-methylsulfanylbutane                         | C5H12S   | 104.066 | -9.35 | 2.27  | 0     | 114.81 | 18 | 3  | 0     | -4.19 | -11.78 | 0    | 2.17  | 2.74  | -50.3  |

|     |                                                                                     |                                                          |          |         |       |      |       |        |    |    |       |       |        |      |       |       |        |
|-----|-------------------------------------------------------------------------------------|----------------------------------------------------------|----------|---------|-------|------|-------|--------|----|----|-------|-------|--------|------|-------|-------|--------|
| 525 | 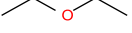   | ethoxy-ethane                                            | C4H10O   | 74.073  | -9.35 | 1.13 | 8.19  | 87.88  | 15 | 2  | 0     | -3.16 | -8.07  | 0.18 | 1     | -1.68 | -17.51 |
| 526 |    | N1,N4-di(3-amino-propyl)-butane-1,4-diamine              | C10H26N4 | 202.216 | -9.25 | -1.5 | 66.26 | 232.67 | 40 | 13 | -6.86 | -5.43 | -17.15 | 3.32 | 19.89 | 9.35  | -51.92 |
| 527 |    | (R)-hexan-3-ol                                           | C6H14O   | 102.104 | -8.99 | 2.16 | 17.13 | 119.59 | 21 | 4  | 0     | -3.96 | -8.27  | 1.84 | 0.61  | -1.41 | -32.55 |
| 528 |    | 2-methyl-butanal                                         | C5H10O   | 86.073  | -8.89 | 1.29 | 14.67 | 99.41  | 16 | 2  | 0     | -3.08 | -7.13  | 0.03 | 0.29  | -1.69 | -23.97 |
| 529 |    | 4-(4-hydroxy-4-methyl-pentyl)-cyclohex-3-enecarbaldehyde | C13H22O2 | 210.162 | -8.86 | 3.16 | 30.78 | 265.44 | 37 | 6  | -4.78 | -5.35 | -11.14 | 1.51 | 11.13 | 9.09  | -47.92 |
| 530 |    | propan-2-one                                             | C3H6O    | 58.042  | -8.78 | 0.35 | 14.42 | 68.93  | 10 | 0  | -3.24 | -2.13 | -12.65 | 0    | 3.41  | 16.58 | -7.64  |
| 531 |    | 1-(methyl-disulfanyl)propane                             | C4H10S2  | 122.252 | -8.75 | 2.32 | 0     | 107.24 | 16 | 3  | 0     | -4.38 | -15.11 | 0.21 | 5.28  | 5.34  | -54.72 |
| 532 |   | butan-2-one                                              | C4H8O    | 72.058  | -8.69 | 0.84 | 13.84 | 87.57  | 13 | 1  | -3.1  | -2.61 | -12.88 | 0    | 3.42  | 16.09 | -14.89 |
| 533 |  | 1-methylsulfanyl-pentane                                 | C6H14S   | 118.082 | -8.6  | 2.76 | 0     | 132.72 | 21 | 4  | 0     | -4.74 | -15.05 | 0.95 | 6.02  | 4.12  | -69.63 |
| 534 |  | 3-methyl-butanal                                         | C5H10O   | 86.073  | -8.34 | 1.3  | 14.61 | 100.67 | 16 | 2  | 0     | -2.9  | -7.8   | 0.16 | 0.43  | -0.18 | -16.71 |
| 535 |  | (R)-4-isopropenyl-1-methyl-cyclohex-1-ene                | C10H16   | 136.125 | -8.27 | 3.83 | 0     | 195.06 | 26 | 1  | 0     | -5.28 | -14.84 | 0    | 6.07  | 7.5   | -79.37 |
| 536 |  | (S)-2-propyl-thietane                                    | C6H12S   | 116.066 | -7.92 | 3.16 | 0     | 130.89 | 19 | 2  | 0     | -4.11 | -10.85 | 0    | 3.61  | 2.68  | -59.51 |
| 537 |  | hexadecan-1-ol                                           | C16H34O  | 242.261 | -7.85 | 6.9  | 17.17 | 301.34 | 51 | 15 | 0     | -6.57 | -14.98 | 5.03 | 3.4   | -0.03 | -68.43 |
| 538 |  | isobutyric acid                                          | C4H8O2   | 89.06   | -7.62 | 0.61 | 28.92 | 88.91  | 15 | 2  | -5.54 | -2.44 | -10.96 | 0    | 9.89  | 15.73 | -56.17 |
| 539 |  | (Z)-pent-2-en-1-ol                                       | C5H10O   | 86.073  | -7.3  | 1.3  | 17.17 | 108.87 | 16 | 3  | -5.31 | -2.9  | -6.63  | 0    | 4.96  | 13.93 | -9.59  |

|     |                                                                                     |                                             |          |         |       |       |       |        |    |    |       |       |        |      |       |       |         |
|-----|-------------------------------------------------------------------------------------|---------------------------------------------|----------|---------|-------|-------|-------|--------|----|----|-------|-------|--------|------|-------|-------|---------|
| 540 |    | 2-methyl-propan-1-ol                        | C4H10O   | 74.073  | -7.28 | 0.95  | 17.63 | 83.72  | 15 | 2  | -6.24 | -2.62 | -7.04  | 1.41 | 4.92  | 18.82 | -10.99  |
| 541 |    | decanoic acid                               | C10H20O2 | 173.154 | -7.26 | 3.76  | 28.89 | 198.49 | 33 | 9  | -2.06 | -4.92 | -23.57 | 4.71 | 12.43 | 15.3  | -118.83 |
| 542 |    | chloroform                                  | CHCl3    | 117.914 | -7.16 | 1.84  | 0     | 63.07  | 5  | 0  | 0     | -3.11 | -6.37  | 0    | 0.87  | 0.96  | 6.05    |
| 543 |    | undecanoic acid                             | C11H22O2 | 187.17  | -6.89 | 4.24  | 28.89 | 216.39 | 36 | 10 | -3.2  | -5.29 | -21.16 | 7.49 | 12.57 | 15.91 | -111.19 |
| 544 |    | formic acid                                 | CH2O2    | 47.013  | -6.82 | -0.34 | 29.25 | 36.86  | 6  | 1  | -3.93 | -0.33 | -6.38  | 0.01 | 6.95  | 5.89  | -20.27  |
| 545 |    | 4-(amino-methyl)-cyclohexanecarboxylic acid | C8H15NO2 | 158.118 | -6.74 | 0.13  | 50.5  | 163.05 | 27 | 4  | -7.01 | -3.3  | -12.3  | 0.86 | 16.91 | 15.79 | -87.68  |
| 546 |    | hexane                                      | C6H14    | 86.11   | -6.7  | 3.24  | 0     | 114.29 | 20 | 3  | 0     | -4.08 | -10.96 | 0.04 | 4.06  | 3.26  | -60.93  |
| 547 |   | (R)-2-ethyl-hexanoic acid                   | C8H16O2  | 145.123 | -6.56 | 2.73  | 28.92 | 160.14 | 27 | 6  | -5.48 | -4.03 | -14.05 | 7.08 | 11.91 | 17.44 | -78.5   |
| 548 |  | butyraldehyde                               | C4H8O    | 72.058  | -6.45 | 0.98  | 14.61 | 86.83  | 13 | 2  | -4.2  | -2.1  | -8.11  | 0.93 | 3.35  | 15.12 | 1.78    |
| 549 |  | 2-methyl-but-2-enoic acid                   | C5H8O2   | 101.06  | -6.17 | 1.24  | 28.92 | 118.77 | 16 | 1  | -3.69 | -2.95 | -13.73 | 0    | 11.85 | 14.21 | -49.39  |
| 550 |  | 3,7,11-trimethyl-dodeca-1,6,10-trien-3-ol   | C15H26O  | 222.198 | -6.15 | 5.24  | 16.84 | 317.23 | 42 | 8  | -2.19 | -6.46 | -16.29 | 0    | 11.83 | 9.61  | -71.33  |
| 551 |  | acetaldehyde                                | C2H4O    | 44.026  | -5.26 | 0.09  | 14.15 | 48.44  | 7  | 0  | -3.22 | -1.25 | -9.97  | 0    | 3.23  | 17.08 | -6.04   |
| 552 |  | propan-2-ol                                 | C3H8O    | 60.058  | -5.05 | 0.52  | 16.85 | 65.31  | 12 | 1  | -3.98 | -2.32 | -8.83  | 0.06 | 4.86  | 16.9  | -8.88   |
| 553 |  | prop-2-ene-1-thiol                          | C3H6S    | 74.019  | -5.04 | 1.65  | 0     | 77.56  | 10 | 2  | -1.55 | -2.1  | -14.39 | 0    | 3.35  | 16.63 | -16.28  |
| 554 |  | (S)-2-methyl-pentanoic acid                 | C6H12O2  | 117.092 | -4.98 | 1.67  | 28.92 | 124.09 | 21 | 4  | -4.02 | -3.42 | -15.71 | 0.93 | 11.56 | 18.38 | -72.32  |

|     |                                                                                     |                                                        |           |         |       |      |       |        |    |    |       |       |        |      |       |       |        |
|-----|-------------------------------------------------------------------------------------|--------------------------------------------------------|-----------|---------|-------|------|-------|--------|----|----|-------|-------|--------|------|-------|-------|--------|
| 555 | 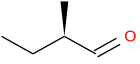   | (R)-2-methyl-butanal                                   | C5H10O    | 86.073  | -4.88 | 1.29 | 14.67 | 99.41  | 16 | 2  | -3.49 | -2.55 | -8.68  | 1.25 | 3.42  | 16.03 | -12.12 |
| 556 |    | (S)-2-methyl-heptanoic acid                            | C8H16O2   | 145.123 | -4.67 | 2.63 | 28.92 | 159.9  | 27 | 6  | -3.79 | -4.09 | -16.92 | 4.38 | 12.23 | 17.89 | -83.12 |
| 557 |    | isobutyraldehyde                                       | C4H8O     | 72.058  | -4.54 | 0.72 | 14.67 | 82.56  | 13 | 1  | -3.45 | -2.13 | -10.65 | 0.17 | 3.45  | 19.83 | -10.99 |
| 558 |    | pentanal                                               | C5H10O    | 86.073  | -4.48 | 1.46 | 14.61 | 104.74 | 16 | 3  | -4.54 | -2.5  | -5.96  | 2.72 | 3.48  | 15.5  | -4.73  |
| 559 |    | butan-1-amine                                          | C4H11N    | 73.089  | -4.45 | 0.51 | 21.67 | 88.53  | 16 | 3  | -3.98 | -2.6  | -8.99  | 1.26 | 6.36  | 14.82 | -6.14  |
| 560 |    | (S)-5-(1,2-dithiolan-3-yl)-pentanoic acid              | C8H14O2S2 | 207.051 | -3.51 | 2.96 | 29.18 | 187.75 | 27 | 6  | -2.24 | -4.67 | -16.9  | 1.21 | 11.98 | 14.54 | -98.17 |
| 561 |    | maleic acid                                            | C4H4O4    | 118.027 | -3.29 | 0.23 | 57.28 | 110.73 | 14 | 2  | -4.82 | -1.54 | -14.72 | 2.13 | 14.44 | 19.15 | -43.55 |
| 562 |  | ethanethiol                                            | C2H6S     | 62.019  | -2.76 | 1.31 | 0     | 58.66  | 9  | 1  | -1.45 | -1.71 | -10.2  | 0.23 | 3.14  | 14.08 | 6.22   |
| 563 |  | butan-1-ol                                             | C4H10O    | 74.073  | -2.2  | 1.11 | 17.17 | 86.46  | 15 | 3  | -3.77 | -2.63 | -7     | 1.49 | 4.96  | 16.04 | -12.8  |
| 564 |  | (1S,5S)-6,6-dimethyl-2-methylene-bicyclo[3.1.1]heptane | C10H16    | 136.125 | -2.17 | 3.72 | 0     | 194.46 | 26 | 0  | 0     | -4.77 | -7.01  | 0.42 | 5.73  | 5.65  | -74.76 |
| 565 |  | palmitic acid                                          | C16H32O2  | 257.248 | -1.39 | 6.65 | 28.89 | 305.93 | 51 | 15 | -1.53 | -7.58 | -19.36 | 8.36 | 11.45 | 14.13 | -97.38 |
| 566 |  | methylsulfanyl-methane                                 | C2H6S     | 62.019  | -0.83 | 0.79 | 0     | 54.94  | 9  | 0  | 0     | -2.79 | -9.47  | 0.06 | 1.69  | 14.01 | -2.49  |
| 567 |  | benzene                                                | C6H6      | 78.047  | -0.76 | 1.86 | 0     | 75.9   | 12 | 0  | 0     | -2.9  | -11.06 | 0    | 1.5   | 16.85 | 5.49   |
| 568 |  | propane-1-thiol                                        | C3H8S     | 76.035  | -0.68 | 1.8  | 0     | 75.66  | 12 | 2  | -1.33 | -2.12 | -9.25  | 1.04 | 3.34  | 14.62 | -10.13 |
| 569 |  | dimethyl disulphide                                    | C2H6S2    | 93.991  | 1.01  | 1.31 | 0     | 63.33  | 10 | 1  | 0     | -3.22 | -10.1  | 0.13 | 1.69  | 17.27 | -9.43  |

|     |                                                                                   |                                            |          |         |       |       |        |        |    |    |       |       |        |      |       |       |         |
|-----|-----------------------------------------------------------------------------------|--------------------------------------------|----------|---------|-------|-------|--------|--------|----|----|-------|-------|--------|------|-------|-------|---------|
| 570 |  | N,N-dimethylmethanamine                    | C3H9N    | 59.073  | 1.22  | 0.14  | 3.81   | 76.7   | 13 | 0  | 0     | -2.82 | -9.58  | 0.11 | 2.88  | 15.96 | -2.27   |
| 571 |  | pyrrolidine                                | C4H9N    | 71.073  | 1.24  | 0.39  | 12.76  | 85.28  | 14 | 0  | -2.64 | -2.56 | -4.24  | 0    | 4.61  | 15.77 | 10.62   |
| 572 |  | tetradecanoic acid                         | C14H28O2 | 229.217 | 1.74  | 5.69  | 28.89  | 270.11 | 45 | 13 | -3.37 | -6.7  | -14.58 | 6.77 | 13.38 | 17.42 | -109.77 |
| 573 |  | (R)-2-hydroxy-succinic acid                | C4H6O5   | 136.037 | 2.82  | -1.54 | 73.45  | 108.21 | 17 | 6  | -8.7  | -1.4  | -15.43 | 0.89 | 20.92 | 33.19 | -74.16  |
| 574 |  | 2-hydroxy-propane-1,2,3-tricarboxylic acid | C6H8O7   | 195.05  | 20.17 | -1.97 | 101.69 | 167.15 | 24 | 9  | -6.81 | -1.63 | -18.69 | 0.75 | 23.43 | 51.85 | -84.66  |
